# Supplementary material for: Regioselective synthesis of 2,3′-biindoles mediated by an NBS-induced homo-coupling of indoles
Source: Royal Society of Chemistry journal article supplement (doi:10.1039/c7ob02312j), 2017-01-01
Supplement: c7ob02312j1.pdf [file c7ob02312j1.pdf]

## Supporting Information for

# Regioselective Synthesis of 2,3'-Biindoles Mediated by an NBS-Promoted Homo-coupling of Indoles

Panpan Huang,<sup>a</sup> Xiangjun Peng,<sup>b</sup> Dan Hu,<sup>a</sup> Huiwu Liao,<sup>a</sup> Shaobin Tang,<sup>\*a</sup> Liangxian Liu<sup>\*a</sup>

<sup>a</sup> Department of Chemistry and Chemical Engineering, Gannan Normal University, Ganzhou, Jiangxi 341000, P. R. China

<sup>b</sup> School of Pharmaceutical Science, Gannan Medical University, Ganzhou, Jiangxi 341000, P. R. China

E-mail: lxliu@xmu.edu.cn

### CONTENTS

|                                                                                                                 |    |
|-----------------------------------------------------------------------------------------------------------------|----|
| 1. General Methods.....                                                                                         | 2  |
| 2. Table S1 Condition Optimization for the Synthesis of <b>10</b> .....                                         | 2  |
| 3. General Procedure and Spectroscopic Data of the Products <b>6</b> , <b>9</b> , <b>10</b> and <b>11</b> ..... | 2  |
| 4. Copies of <sup>1</sup> H and <sup>13</sup> C Spectra.....                                                    | 11 |
| 5. Copies of HRESIMS Spectra for <b>6n</b> .....                                                                | 37 |
| 6. X-ray Data of Compound <b>10b</b> .....                                                                      | 38 |
| 7. References.....                                                                                              | 38 |

## 1. General Methods

$^1\text{H}$  and  $^{13}\text{C}$  NMR spectra were recorded on a Bruker spectrometers at 400 and 100 MHz, respectively. Mass spectra were recorded with Bruker Dalton Esquire 3000 plus LC-MS apparatus. Elemental analysis were carried out on a Perkin-Elmer 240B instrument. HRFABMS spectra were recorded on a FTMS apparatus. Silica gel (300-400 mesh) was used for flash column chromatography, eluting (unless otherwise stated) with an ethyl acetate/petroleum ether (PE) (60-90 °C) mixture.

## 2. Table S1 Condition optimization of the NBS-promoted homo-coupling of indoles for the synthesis of 2-(5,12-dihydroindolo[3,2-a]carbazol-6-yl)anilines 10.<sup>a</sup>

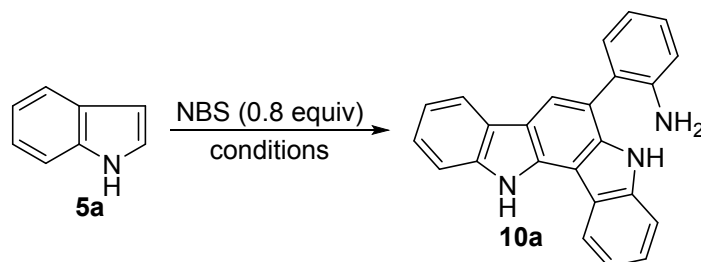

| entry | catalyst (0.2 equiv) | solvent                                                       | temp. (°C) | yield (%) <sup>b</sup> |
|-------|----------------------|---------------------------------------------------------------|------------|------------------------|
| 1     | CuI                  | CHCl <sub>3</sub>                                             | 15         | trace                  |
| 2     | CuSO <sub>4</sub>    | CHCl <sub>3</sub>                                             | 15         | trace                  |
| 3     | Pd(OAc) <sub>2</sub> | CHCl <sub>3</sub>                                             | 15         | 10                     |
| 4     | NiSO <sub>4</sub>    | CHCl <sub>3</sub>                                             | 15         | 13                     |
| 5     | FeCl <sub>2</sub>    | CHCl <sub>3</sub>                                             | 15         | trace                  |
| 6     | FeCl <sub>3</sub>    | CHCl <sub>3</sub>                                             | 15         | trace                  |
| 7     | -                    | DMSO                                                          | 15         | trace                  |
| 8     | -                    | DMF                                                           | 15         | trace                  |
| 9     | -                    | DCE                                                           | 15         | 15                     |
| 10    | -                    | CH <sub>3</sub> CO <sub>2</sub> C <sub>2</sub> H <sub>5</sub> | 15         | 27                     |
| 11    | -                    | H <sub>2</sub> O                                              | 15         | trace                  |
| 12    | -                    | CH <sub>3</sub> CN                                            | 15         | 35                     |
| 13    | -                    | Pyridine                                                      | 15         | trace                  |
| 14    | -                    | EtOH                                                          | 15         | trace                  |
| 15    | -                    | CHCl <sub>3</sub>                                             | 15         | 45                     |
| 16    | -                    | CH <sub>2</sub> Cl <sub>2</sub>                               | 15         | 38                     |
| 17    | -                    | CHCl <sub>3</sub>                                             | 5          | 5                      |
| 18    | -                    | CHCl <sub>3</sub>                                             | 15         | 8                      |
| 19    | -                    | CHCl <sub>3</sub>                                             | 25         | 35                     |
| 20    | -                    | CHCl <sub>3</sub>                                             | 35         | 61                     |
| 21    | -                    | CHCl <sub>3</sub>                                             | 40         | 36                     |
| 22    | -                    | CHCl <sub>3</sub>                                             | 45         | 20                     |

<sup>a</sup> Conditions: **5** (0.3 mmol) and NBS (0.24 mmol), in CHCl<sub>3</sub> (1 mL), 12 h, under open air.

<sup>b</sup> Isolated yield.

### 3.1 General Procedure for the Preparation of 6.

To a solution of indole (0.3 mmol) in CHCl<sub>3</sub> (1 mL) was added NBS (0.24 mmol) under an air atmosphere and the mixture was stirred at 15 °C for 6 h. The reaction mixture was concentrated

under reduced pressure. The residue was purified by flash chromatography on silica gel (eluent: EtOAc/PE = 1:1) to yield the corresponding product **6**.

### 3.2 Spectroscopic Data of the Products **6** and **9**.

#### 1*H*,1'*H*-2,3'-Biindole (**6a**)

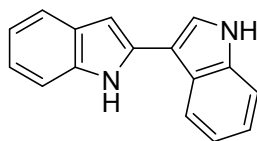

Yellow amorphous solid. <sup>1</sup>H NMR (400 MHz, DMSO-*d*<sub>6</sub>): δ 11.38 (s, 1H), 11.18 (s, 1H), 8.00 (d, *J* = 7.5 Hz, 1H), 7.86 (d, *J* = 2.6 Hz, 1H), 7.48 (dd, *J* = 11.8, 7.6 Hz, 2H), 7.35 (d, *J* = 7.8 Hz, 1H), 7.19 – 7.14 (m, 2H), 7.02 (dd, *J* = 11.0, 4.0 Hz, 1H), 6.96 (dd, *J* = 10.8, 3.9 Hz, 1H), 6.75 (d, *J* = 1.5 Hz, 1H). <sup>13</sup>C NMR (101 MHz, DMSO-*d*<sub>6</sub>): δ 137.1, 136.5, 134.6, 129.7, 125.1, 123.6, 122.2, 120.7, 120.2, 120.1, 119.5, 119.3, 112.4, 110.9, 108.9, 97.3. MS (ESI): 233 (M+H<sup>+</sup>, 100). These assignments matched with those previously published.<sup>1</sup>

#### 5,5'-Difluoro-1*H*,1'*H*-2,3'-biindole (**6b**)

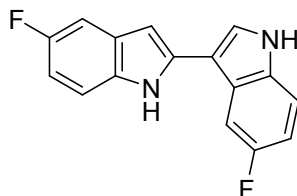

Yellow amorphous solid. <sup>1</sup>H NMR (400 MHz, DMSO-*d*<sub>6</sub>): δ 11.56 (s, 1H), 11.31 (s, 1H), 7.94 (d, *J* = 2.6 Hz, 1H), 7.71 (dd, *J* = 10.3, 2.3 Hz, 1H), 7.48 (dd, *J* = 8.8, 4.7 Hz, 1H), 7.32 (dd, *J* = 8.6, 4.6 Hz, 1H), 7.22 (dd, *J* = 10.0, 2.4 Hz, 1H), 7.04 (dt, *J* = 2.4, 9.1 Hz, 1H), 6.85 (dt, *J* = 2.5, 9.4 Hz, 1H), 6.75 (d, *J* = 1.4 Hz, 1H). <sup>13</sup>C NMR (101 MHz, DMSO-*d*<sub>6</sub>): δ 158.0 (d, *J* = 231.4 Hz), 157.5 (d, *J* = 230.5 Hz), 136.1, 133.8, 133.2, 130.0 (d, *J* = 10.5 Hz), 125.9, 125.1 (d, *J* = 10.2 Hz), 113.5 (d, *J* = 9.9 Hz), 111.6 (d, *J* = 9.9 Hz), 110.5 (d, *J* = 26.0 Hz), 108.9 (d, *J* = 4.6 Hz), 108.5 (d, *J* = 25.8 Hz), 104.8 (d, *J* = 24.0 Hz), 104.2 (d, *J* = 23.2 Hz), 97.6 (d, *J* = 4.5 Hz). MS (ESI): 269 (M+H<sup>+</sup>, 100). Anal calcd for C<sub>16</sub>H<sub>10</sub>F<sub>2</sub>N<sub>2</sub>: C, 71.64; H, 3.76; N, 10.44. Found C, 71.37; H, 4.13; N, 10.18.

#### 5,5'-Dichloro-1*H*,1'*H*-2,3'-biindole (**6c**)

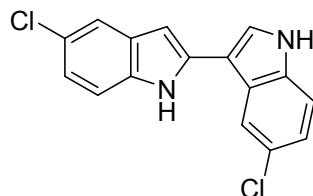

Yellow amorphous solid. <sup>1</sup>H NMR (400 MHz, DMSO-*d*<sub>6</sub>): δ 11.65 (s, 1H), 11.43 (s, 1H), 8.08-7.81 (m, 2H), 7.49 (d, *J* = 10.7 Hz, 2H), 7.35 (d, *J* = 8.5 Hz, 1H), 7.19 (dd, *J* = 8.6, 1.4 Hz, 1H), 7.02 (dd, *J* = 8.5, 1.6 Hz, 1H), 6.76 (s, 1H). <sup>13</sup>C NMR (101 MHz, DMSO-*d*<sub>6</sub>): δ 137.6, 137.0, 135.1, 128.4, 127.0, 125.4, 125.0, 123.8, 121.4, 120.8, 120.6, 119.7, 112.1, 110.5, 108.8, 97.7. MS (ESI): 301 (M+H<sup>+</sup>, 100), 303 (M+H<sup>+</sup>, 30). These assignments matched with those previously published.<sup>2</sup>

#### 5,5'-Dibromo-1*H*,1'*H*-2,3'-biindole (**6d**)

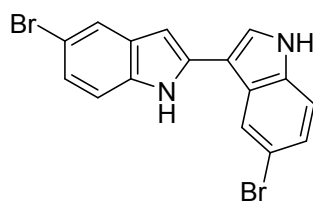

Yellow amorphous solid.  $^1\text{H}$  NMR (400 MHz,  $\text{DMSO-}d_6$ ):  $\delta$  11.66 (s, 1H), 11.43 (s, 1H), 8.10 (s, 1H), 7.92 (d,  $J = 2.6$  Hz, 1H), 7.66 (d,  $J = 1.7$  Hz, 1H), 7.45 (d,  $J = 8.6$  Hz, 1H), 7.38-7.26 (m, 2H), 7.13 (dd,  $J = 8.5, 1.9$  Hz, 1H), 6.75 (d,  $J = 1.2$  Hz, 1H).  $^{13}\text{C}$  NMR (101 MHz,  $\text{DMSO-}d_6$ ):  $\delta$  135.9, 135.4, 135.3, 131.6, 126.7, 125.7, 124.9, 123.3, 122.1, 121.8, 114.5, 113.1, 112.9, 111.9, 108.2, 97.3. MS (ESI): 391 ( $\text{M}+\text{H}^+$ , 100). These assignments matched with those previously published.<sup>2</sup>  
5,5'-Dibromo-1H,1'H-2,3'-biindole (**6e**)

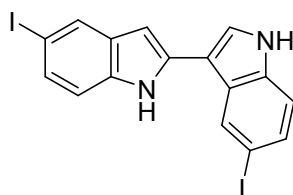

Yellow amorphous solid.  $^1\text{H}$  NMR (400 MHz,  $\text{DMSO-}d_6$ ):  $\delta$  11.64 (s, 1H), 11.42 (s, 1H), 8.26 (s, 1H), 7.86 (d,  $J = 7.9$  Hz, 2H), 7.45 (d,  $J = 8.5$  Hz, 1H), 7.33 (d,  $J = 8.5$  Hz, 1H), 7.28 (d,  $J = 8.3$  Hz, 1H), 7.20 (d,  $J = 8.3$  Hz, 1H), 6.71 (s, 1H).  $^{13}\text{C}$  NMR (101 MHz,  $\text{DMSO-}d_6$ ):  $\delta$  136.2, 135.7, 134.9, 132.5, 130.4, 128.8, 128.2, 128.1, 127.6, 125.2, 115.0, 113.4, 107.8, 96.9, 84.4, 83.0. MS (ESI): 485 ( $\text{M}+\text{H}^+$ , 100). Anal calcd for  $\text{C}_{16}\text{H}_{10}\text{I}_2\text{N}_2$ : C, 39.70; H, 2.08; N, 5.79. Found C, 40.05; H, 2.30; N, 5.48.

5,5'-Dimethyl-1H,1'H-2,3'-biindole (**6f**)

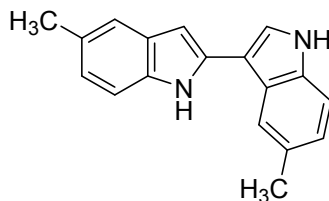

Yellow amorphous solid.  $^1\text{H}$  NMR (400 MHz,  $\text{DMSO-}d_6$ ):  $\delta$  11.21 (s, 1H), 10.99 (s, 1H), 7.77 (d,  $J = 2.7$  Hz, 2H), 7.33 (d,  $J = 8.2$  Hz, 1H), 7.26 (s, 1H), 7.21 (d,  $J = 8.1$  Hz, 1H), 6.99 (dd,  $J = 8.3, 1.1$  Hz, 1H), 6.83 (dd,  $J = 8.2, 1.2$  Hz, 1H), 6.64 (d,  $J = 1.4$  Hz, 1H), 2.45 (s, 3H), 2.36 (s, 3H).  $^{13}\text{C}$  NMR (101 MHz,  $\text{DMSO-}d_6$ ):  $\delta$  135.5, 134.9, 134.8, 130.0, 128.8, 127.5, 125.4, 123.7, 123.5, 122.2, 119.7, 119.2, 112.0, 110.5, 108.6, 96.8, 21.8, 21.7. MS (ESI): 261 ( $\text{M}+\text{H}^+$ , 100). Anal calcd for  $\text{C}_{18}\text{H}_{16}\text{N}_2$ : C, 83.04; H, 6.19; N, 10.76. Found C, 82.87; H, 6.01; N, 10.83.

5,5'-Dimethoxy-1H,1'H-2,3'-biindole (**6g**)

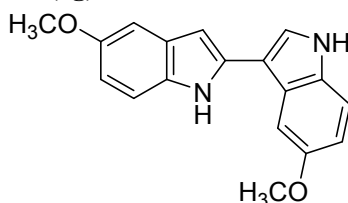

Yellow amorphous solid.  $^1\text{H}$  NMR (400 MHz,  $\text{DMSO-}d_6$ ):  $\delta$  11.22 (s, 1H), 10.97 (s, 1H), 7.76 (d,  $J = 2.7$  Hz, 1H), 7.36 (dd,  $J = 14.7, 5.6$  Hz, 2H), 7.21 (d,  $J = 8.7$  Hz, 1H), 7.01 (d,  $J = 2.4$  Hz, 1H), 6.82 (dd,  $J = 8.8, 2.3$  Hz, 1H), 6.69-6.61 (m, 2H), 3.83 (s, 3H), 3.74 (s, 3H).  $^{13}\text{C}$  NMR (101 MHz,  $\text{DMSO-}d_6$ ):  $\delta$  154.5, 153.8, 135.4, 132.2, 131.6, 130.2, 125.5, 124.1, 113.1, 112.3, 111.4, 110.3,

110.2, 108.9, 101.9, 97.1, 60.2, 55.9. MS (ESI): 293 (M+H<sup>+</sup>, 100). These assignments matched with those previously published.<sup>2</sup>

5,5'-Bis(benzyloxy)-1*H*,1'*H*-2,3'-biindole (**6h**)

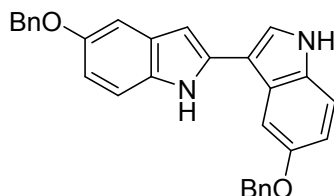

Yellow amorphous solid. <sup>1</sup>H NMR (400 MHz, DMSO-*d*<sub>6</sub>): δ 11.25 (d, *J* = 2.0 Hz, 1H), 11.01 (s, 1H), 7.80 (d, *J* = 2.6 Hz, 1H), 7.56-7.50 (m, 3H), 7.47 (d, *J* = 7.2 Hz, 2H), 7.39 (dd, *J* = 14.2, 7.5 Hz, 5H), 7.32 (dd, *J* = 7.3, 4.6 Hz, 2H), 7.25 (d, *J* = 8.6 Hz, 1H), 7.10 (d, *J* = 2.2 Hz, 1H), 6.92 (dd, *J* = 8.8, 2.3 Hz, 1H), 6.76 (dd, *J* = 8.6, 2.4 Hz, 1H), 6.64 (d, *J* = 1.1 Hz, 1H), 5.19 (s, 2H), 5.10 (s, 2H). <sup>13</sup>C NMR (101 MHz, DMSO-*d*<sub>6</sub>): δ 153.6, 152.9, 138.5, 138.3, 135.5, 132.4, 131.8, 130.2, 129.0, 128.9, 128.8, 128.7, 128.2, 128.1, 128.0, 127.9, 125.5, 124.2, 113.1, 112.9, 111.4, 111.1, 108.9, 103.8, 103.5, 97.2, 70.6, 70.4. MS (ESI): 445 (M+H<sup>+</sup>, 100). Anal calcd for C<sub>30</sub>H<sub>24</sub>N<sub>2</sub>O<sub>2</sub>: C, 81.06; H, 5.44; N, 6.30. Found C, 80.73; H, 5.46; N, 6.51.

1*H*,1'*H*-[3, 3'-Biindole]-5,5'-dicarboxylic acid (**6i**)

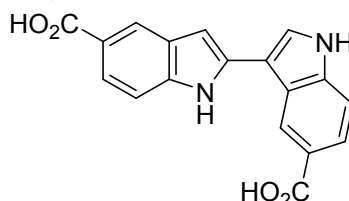

Yellow amorphous solid. <sup>1</sup>H NMR (400 MHz, DMSO-*d*<sub>6</sub>): δ 12.50 (s, 2H), 11.81 (d, *J* = 2.2 Hz, 1H), 11.68 (d, *J* = 1.2 Hz, 1H), 8.64 (s, 1H), 8.27-8.24 (m, 1H), 7.99 (d, *J* = 2.6 Hz, 1H), 7.83 (dd, *J* = 8.6, 1.5 Hz, 1H), 7.71 (dd, *J* = 8.5, 1.6 Hz, 1H), 7.55 (d, *J* = 8.6 Hz, 1H), 7.43 (d, *J* = 8.5 Hz, 1H), 6.89 (d, *J* = 1.4 Hz, 1H). <sup>13</sup>C NMR (101 MHz, DMSO-*d*<sub>6</sub>): δ 168.9, 168.7, 139.6, 139.2, 135.4, 129.2, 125.6, 124.7, 123.6, 123.0, 122.6, 122.5, 122.4, 122.0, 112.3, 110.7, 109.7, 98.8. MS (ESI): 321 (M+H<sup>+</sup>, 100). Anal calcd for C<sub>18</sub>H<sub>12</sub>N<sub>2</sub>O<sub>4</sub>: C, 67.50; H, 3.78; N, 8.75. Found C, 67.84; H, 3.60; N, 9.02.

6,6'-Difluoro-1*H*,1'*H*-2,3'-biindole (**6j**)

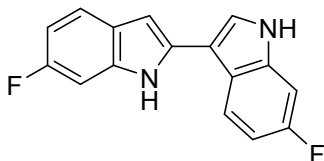

Yellow amorphous solid. <sup>1</sup>H NMR (400 MHz, DMSO-*d*<sub>6</sub>): δ 11.46 (s, 1H), 11.34 (s, 1H), 7.96 (dd, *J* = 8.6, 5.4 Hz, 1H), 7.84 (d, *J* = 2.3 Hz, 1H), 7.47 (dd, *J* = 8.4, 5.5 Hz, 1H), 7.25 (dd, *J* = 9.9, 2.1 Hz, 1H), 7.10 (d, *J* = 10.0 Hz, 1H), 7.03-6.97 (m, 1H), 6.83 (dd, *J* = 13.2, 5.3 Hz, 1H), 6.77 (s, 1H). <sup>13</sup>C NMR (101 MHz, DMSO-*d*<sub>6</sub>): δ 159.5 (d, *J* = 235.4 Hz), 159.0 (d, *J* = 233.3 Hz), 137.1 (d, *J* = 12.6 Hz), 136.4 (d, *J* = 12.7 Hz), 134.8 (d, *J* = 3.5 Hz), 126.4, 124.2 (d, *J* = 3.1 Hz), 121.9, 121.1 (d, *J* = 10.2 Hz), 120.4 (d, *J* = 10.0 Hz), 108.9, 108.7 (d, *J* = 24.3 Hz), 107.5 (d, *J* = 24.0 Hz), 98.4 (d, *J* = 25.5 Hz), 97.4, 97.1 (d, *J* = 25.6 Hz). MS (ESI): 269 (M+H<sup>+</sup>, 100). Anal calcd for C<sub>16</sub>H<sub>10</sub>F<sub>2</sub>N<sub>2</sub>: C, 71.64; H, 3.76; N, 10.44. Found C, 71.79; H, 3.92; N, 10.25.

6,6'-Dichloro-1*H*,1'*H*-2,3'-biindole (**6k**)

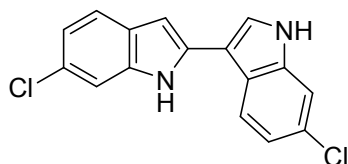

Yellow amorphous solid.  $^1\text{H}$  NMR (400 MHz,  $\text{DMSO-}d_6$ ):  $\delta$  11.56 (s, 1H), 11.41 (s, 1H), 7.98 (d,  $J = 8.6$  Hz, 1H), 7.90 (d,  $J = 2.5$  Hz, 1H), 7.51 (dd,  $J = 14.9, 5.0$  Hz, 2H), 7.35 (s, 1H), 7.16 (dd,  $J = 8.4, 1.5$  Hz, 1H), 6.98 (dd,  $J = 8.3, 1.6$  Hz, 1H), 6.79 (s, 1H).  $^{13}\text{C}$  NMR (101 MHz,  $\text{DMSO-}d_6$ ):  $\delta$  137.5, 137.0, 135.0, 128.4, 127.0, 125.4, 125.0, 123.8, 121.4, 120.8, 120.6, 119.6, 112.1, 110.5, 108.8, 97.7. MS (ESI): 301 ( $\text{M}+\text{H}^+$ , 100), 303 ( $\text{M}+\text{H}^+$ , 30). Anal calcd for  $\text{C}_{16}\text{H}_{10}\text{Cl}_2\text{N}_2$ : C, 63.81; H, 3.35; N, 9.30. Found C, 64.20; H, 3.48; N, 9.17.

6,6'-Dimethyl-1H,1'H-2,3'-biindole (**6l**)

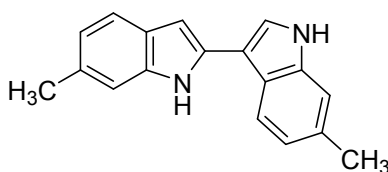

Yellow amorphous solid.  $^1\text{H}$  NMR (400 MHz,  $\text{DMSO-}d_6$ ):  $\delta$  11.18 (s, 1H), 10.98 (s, 1H), 7.84 (d,  $J = 8.2$  Hz, 1H), 7.73 (d,  $J = 2.6$  Hz, 1H), 7.35 (d,  $J = 7.9$  Hz, 1H), 7.23 (s, 1H), 7.12 (s, 1H), 6.96 (dd,  $J = 8.2, 1.0$  Hz, 1H), 6.78 (dd,  $J = 8.0, 0.9$  Hz, 1H), 6.65 (d,  $J = 1.4$  Hz, 1H), 2.42 (s, 3H), 2.39 (s, 3H).  $^{13}\text{C}$  NMR (101 MHz,  $\text{DMSO-}d_6$ ):  $\delta$  137.6, 136.9, 134.1, 131.2, 129.6, 127.6, 123.1, 122.6, 121.9, 120.9, 119.8, 119.2, 112.1, 110.8, 109.0, 97.0, 22.0, 21.8. MS (ESI): 261 ( $\text{M}+\text{H}^+$ , 100). Anal calcd for  $\text{C}_{18}\text{H}_{16}\text{N}_2$ : C, 83.04; H, 6.19; N, 10.76. Found C, 82.96; H, 5.82; N, 10.49.

7,7'-Dimethyl-1H,1'H-2,3'-biindole (**6m**)

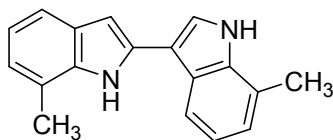

Yellow amorphous solid.  $^1\text{H}$  NMR (400 MHz,  $\text{DMSO-}d_6$ ):  $\delta$  11.36 (s, 1H), 10.78 (s, 1H), 8.03 (d,  $J = 2.7$  Hz, 1H), 7.81 (d,  $J = 7.9$  Hz, 1H), 7.32 (d,  $J = 7.6$  Hz, 1H), 7.05 (t,  $J = 7.8$  Hz, 1H), 6.98 (d,  $J = 7.0$  Hz, 1H), 6.87 (t,  $J = 7.2$  Hz, 1H), 6.81 (d,  $J = 7.0$  Hz, 1H), 6.75 (t,  $J = 2.0$  Hz, 1H), 2.51 (s, 3H), 2.49 (s, 3H).  $^{13}\text{C}$  NMR (101 MHz,  $\text{DMSO-}d_6$ ):  $\delta$  136.6, 135.8, 134.6, 129.4, 125.0, 123.8, 122.6, 121.6, 121.4, 120.3, 120.1, 119.5, 117.8, 117.2, 109.3, 98.0, 17.6, 17.2. MS (ESI): 261 ( $\text{M}+\text{H}^+$ , 100). These assignments matched with those previously published.<sup>2</sup>

7,7'-Dimethoxy-1H,1'H-2,3'-biindole (**6n**)

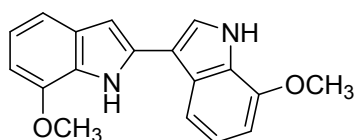

Yellow amorphous solid.  $^1\text{H}$  NMR (400 MHz,  $\text{DMSO-}d_6$ ):  $\delta$  11.41 (s, 1H), 11.13 (s, 1H), 8.00 (s, 1H), 7.55 (d,  $J = 8.0$  Hz, 1H), 7.12-7.00 (m, 2H), 6.90 – 6.83 (m, 1H), 6.72 (d,  $J = 6.8$  Hz, 2H), 6.60 (d,  $J = 7.5$  Hz, 1H), 3.92 (s, 6H).  $^{13}\text{C}$  NMR (101 MHz,  $\text{DMSO-}d_6$ ):  $\delta$  146.8, 146.1, 134.6, 131.2, 127.2, 126.8, 126.2, 123.7, 120.8, 119.8, 112.9, 112.7, 109.2, 102.6, 101.9, 98.0, 55.7, 55.5. HRESIMS calcd for  $[\text{C}_{18}\text{H}_{16}\text{N}_2\text{O}_2 + \text{H}]^+$  293.12900, found 293.12859.

7,7'-Diethyl-1*H*,1'*H*-2,3'-biindole (**6o**)

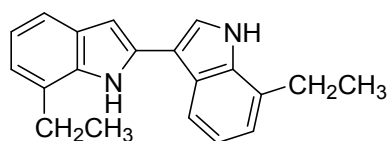

Yellow amorphous solid. <sup>1</sup>H NMR (400 MHz, DMSO-*d*<sub>6</sub>): δ 11.35 (s, 1H), 10.76 (s, 1H), 8.02 (d, *J* = 2.5 Hz, 1H), 7.80 (d, *J* = 7.9 Hz, 1H), 7.32 (d, *J* = 7.5 Hz, 1H), 7.07 (t, *J* = 7.5 Hz, 1H), 7.00 (d, *J* = 7.0 Hz, 1H), 6.95-6.79 (m, 2H), 6.74 (d, *J* = 1.6 Hz, 1H), 2.94 (q, *J* = 7.5 Hz, 2H), 2.90 (q, *J* = 7.5 Hz, 2H), 1.31 (t, *J* = 7.5 Hz, 3H), 1.30 (t, *J* = 7.5 Hz, 3H). <sup>13</sup>C NMR (101 MHz, DMSO-*d*<sub>6</sub>): δ 135.8, 135.1, 134.6, 129.6, 127.8, 126.6, 125.3, 123.8, 120.8, 120.5, 119.65 (d, *J* = 8.4 Hz), 117.8, 117.2, 109.3, 98.1, 24.2, 24.1, 15.1, 14.9. MS (ESI): 289 (M+H<sup>+</sup>, 100). Anal calcd for C<sub>20</sub>H<sub>20</sub>N<sub>2</sub>: C, 83.30; H, 6.99; N, 9.71. Found C, 83.04; H, 6.83; N, 9.39.

4,4'-Dimethyl-1*H*,1'*H*-2,3'-biindole (**6p**)

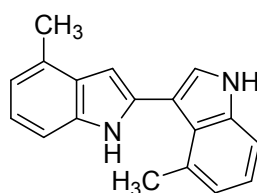

Yellow amorphous solid. <sup>1</sup>H NMR (400 MHz, DMSO-*d*<sub>6</sub>): δ 11.31 (s, 1H), 11.09 (s, 1H), 7.44 (d, *J* = 2.5 Hz, 1H), 7.28 (d, *J* = 8.1 Hz, 1H), 7.16 (d, *J* = 8.1 Hz, 1H), 7.07-6.99 (m, 1H), 6.97-6.88 (m, 1H), 6.78 (dd, *J* = 9.5, 7.2 Hz, 2H), 6.40 (d, *J* = 1.5 Hz, 1H), 2.47 (s, 3H), 2.32 (s, 3H). <sup>13</sup>C NMR (101 MHz, DMSO-*d*<sub>6</sub>): δ 136.8, 136.3, 134.1, 130.3, 128.8, 128.4, 125.9, 125.7, 122.0, 121.2, 120.8, 119.3, 110.1, 109.4, 108.9, 100.4, 20.3, 19.1. MS (ESI): 261 (M+H<sup>+</sup>, 100). Anal calcd for C<sub>18</sub>H<sub>16</sub>N<sub>2</sub>: C, 83.04; H, 6.19; N, 10.76. Found C, 82.87; H, 5.95; N, 10.38.

4,4'-Bis(benzyloxy)-1*H*,1'*H*-2,3'-biindole (**6q**)

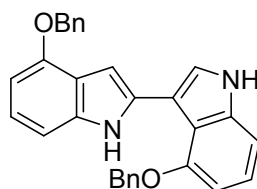

Yellow amorphous solid. <sup>1</sup>H NMR (400 MHz, DMSO-*d*<sub>6</sub>) δ 11.53 (d, *J* = 2.2 Hz, 1H), 10.65 (d, *J* = 1.5 Hz, 1H), 7.84 (d, *J* = 2.6 Hz, 1H), 7.58-7.55 (m, 2H), 7.48 (d, *J* = 7.2 Hz, 2H), 7.40-7.33 (m, 5H), 7.10 (d, *J* = 4.1 Hz, 2H), 6.81-6.76 (m, 4H), 6.49 (d, *J* = 7.8 Hz, 1H), 6.32 (d, *J* = 8.0 Hz, 1H), 5.27 (s, 2H), 5.18 (s, 2H), 3.37 (s, 2H). <sup>13</sup>C NMR (101 MHz, DMSO-*d*<sub>6</sub>): δ 152.5, 151.4, 139.0, 138.3, 137.4, 137.0, 133.3, 129.1, 129.0, 128.8, 128.6, 128.0, 127.8, 124.2, 122.8, 120.8, 120.1, 114.8, 108.7, 106.4, 104.8, 101.9, 101.2, 95.3, 70.6, 69.5. MS (ESI): 445 (M+H<sup>+</sup>, 100). Anal calcd for C<sub>30</sub>H<sub>24</sub>N<sub>2</sub>O<sub>2</sub>: C, 81.06; H, 5.44; N, 6.30. Found C, 80.91; H, 5.28; N, 6.03.

1,1'-Dimethyl-1*H*,1'*H*-2,3'-biindole (**6r**)

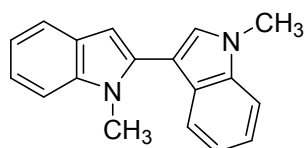

Yellow amorphous solid. <sup>1</sup>H NMR (400 MHz, DMSO-*d*<sub>6</sub>): δ 7.71 (s, 1H), 7.68 (s, 1H), 7.53 (s, 1H), 7.44 (s, 1H), 7.24 (d, *J* = 7.3 Hz, 2H), 7.14 (d, *J* = 4.6 Hz, 2H), 7.04 (t, *J* = 7.4 Hz, 2H), 3.87

(s, 3H), 3.76 (s, 3H).  $^{13}\text{C}$  NMR (101 MHz, DMSO- $d_6$ ):  $\delta$  138.0, 137.2, 135.4, 129.7, 128.4, 127.3, 122.4, 121.0, 120.5, 120.0, 119.9, 119.7, 110.6, 110.1, 106.2, 100.6, 33.1, 31.3. MS (ESI): 261 ( $\text{M}+\text{H}^+$ , 100). Anal calcd for  $\text{C}_{18}\text{H}_{16}\text{N}_2$ : C, 83.04; H, 6.19; N, 10.76. Found C, 82.76; H, 5.84; N, 10.59.

### 3-Methylindolin-2-one (9)

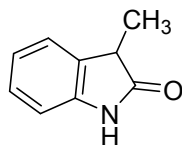

White amorphous solid.  $^1\text{H}$  NMR (400 MHz, DMSO- $d_6$ ):  $\delta$  10.31 (s, 1H), 7.22 (d,  $J = 7.4$  Hz, 1H), 7.15 (t,  $J = 7.7$  Hz, 1H), 6.93 (t,  $J = 7.4$  Hz, 1H), 6.81 (d,  $J = 7.7$  Hz, 1H), 3.38 (q,  $J = 7.6$  Hz, 1H), 1.30 (d,  $J = 7.6$  Hz, 3H).  $^{13}\text{C}$  NMR (101 MHz, DMSO- $d_6$ ):  $\delta$  180.1, 142.8, 131.8, 128.0, 124.1, 121.7, 109.6, 40.6, 15.5. MS (ESI): 148 ( $\text{M}+\text{H}^+$ , 100).

### 3.3 General Procedure for the Preparation of 10.

To a solution of indole (0.3 mmol) in  $\text{CH}_3\text{CN}$  (1 mL) was added NBS (0.24 mmol) under an air atmosphere and the mixture was stirred at room temperature for 12 h. The reaction mixture was concentrated under reduced pressure. The residue was purified by flash chromatography on silica gel (eluent: EtOAc/PE = 1:2) to yield the corresponding product 10.

### 3.4 Spectroscopic Data of the Products 10

#### 2-(5,12-Dihydroindolo[3,2-*a*]carbazol-6-yl)aniline (10a)

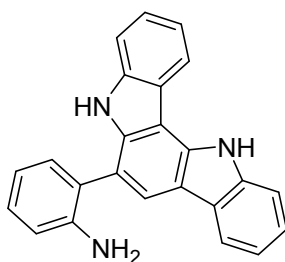

Yellow amorphous solid.  $^1\text{H}$  NMR (400 MHz, DMSO- $d_6$ ):  $\delta$  11.74 (s, 1H), 10.81 (s, 1H), 8.66 (d,  $J = 7.8$  Hz, 1H), 8.11 (d,  $J = 7.7$  Hz, 1H), 8.02 (s, 1H), 7.62 (dd,  $J = 14.1, 8.0$  Hz, 2H), 7.32-7.14 (m, 6H), 6.90 (dd,  $J = 8.1, 1.0$  Hz, 1H), 6.75 (dt,  $J = 1.2, 7.4$  Hz, 1H), 4.64 (s, 2H).  $^{13}\text{C}$  NMR (101 MHz, DMSO- $d_6$ ):  $\delta$  149.5, 139.9, 139.6, 137.7, 133.7, 131.5, 128.6, 124.5, 124.2, 124.1, 123.9, 122.0, 121.5, 119.5, 119.4, 119.3, 119.1, 117.1, 115.7, 115.6, 115.4, 111.9, 111.5, 107.1. MS (ESI): 348 ( $\text{M}+\text{H}^+$ , 100). These assignments matched with those previously published.<sup>3</sup>

#### 3-Chloro-2-(1,8-dichloro-5,12-dihydroindolo[3,2-*a*]carbazol-6-yl)aniline (10b)

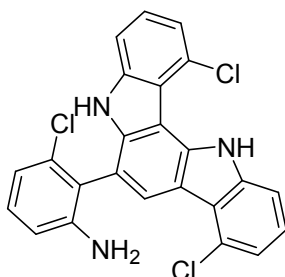

Yellow amorphous solid.  $^1\text{H}$  NMR (400 MHz, DMSO- $d_6$ ):  $\delta$  11.39 (s, 1H), 10.93 (s, 1H), 8.38 (s, 1H), 7.92 (d,  $J = 7.7$  Hz, 1H), 7.55 (d,  $J = 8.0$  Hz, 1H), 7.44-7.26 (m, 5H), 7.25-7.15 (m, 2H), 4.64



(s, 2H).  $^{13}\text{C}$  NMR (101 MHz,  $\text{DMSO-}d_6$ ):  $\delta$  149.4, 141.1, 140.4, 138.7, 135.0, 133.8, 130.1, 125.9, 125.8, 125.1, 124.8, 122.9, 121.0, 120.5, 120.4, 120.3, 119.8, 117.0, 115.2, 113.8, 113.0, 111.7, 111.1, 105.5. MS (ESI): 450 ( $\text{M}+\text{H}^+$ , 100). Anal calcd for  $\text{C}_{24}\text{H}_{14}\text{Cl}_3\text{N}_3$ : C, 63.95; H, 3.13; N, 9.32. Found C, 64.07; H, 3.28; N, 9.01.

2-Chloro-6-(4,11-dichloro-5,12-dihydroindolo[3,2-*a*]carbazol-6-yl)aniline (**10c**)

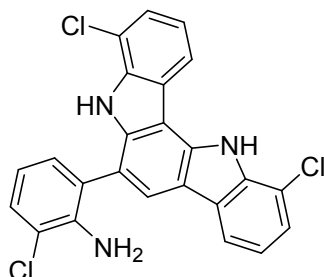

Yellow amorphous solid.  $^1\text{H}$  NMR (400 MHz,  $\text{DMSO-}d_6$ ):  $\delta$  11.74 (s, 1H), 10.94 (s, 1H), 9.05 (d,  $J = 7.8$  Hz, 1H), 8.20-8.10 (m, 2H), 7.48 (dd,  $J = 7.7, 0.8$  Hz, 1H), 7.42 (dd,  $J = 7.7, 0.9$  Hz, 1H), 7.36 (dd,  $J = 8.0, 1.4$  Hz, 1H), 7.31 (t,  $J = 7.8$  Hz, 1H), 7.24-7.17 (m, 2H), 6.77 (t,  $J = 7.8$  Hz, 1H), 4.69 (s, 2H).  $^{13}\text{C}$  NMR (101 MHz,  $\text{DMSO-}d_6$ ):  $\delta$  142.9, 138.6, 136.9, 136.4, 134.3, 130.7, 129.0, 126.5, 125.9, 124.8, 124.3, 124.1, 121.8, 121.1, 121.0, 120.3, 118.8, 118.5, 117.7, 116.9, 116.7, 116.1, 115.7, 108.4. MS (ESI): 450 ( $\text{M}+\text{H}^+$ , 100). Anal calcd for  $\text{C}_{24}\text{H}_{14}\text{Cl}_3\text{N}_3$ : C, 63.95; H, 3.13; N, 9.32. Found C, 63.80; H, 3.32; N, 8.96.

2-Bromo-6-(4,11-dibromo-5,12-dihydroindolo[3,2-*a*]carbazol-6-yl)aniline (**10d**)

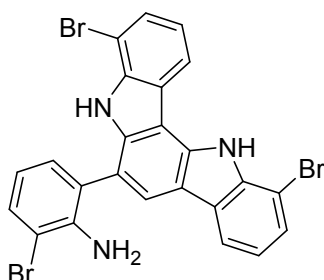

Yellow amorphous solid.  $^1\text{H}$  NMR (400 MHz,  $\text{DMSO-}d_6$ ):  $\delta$  11.54 (s, 1H), 10.53 (s, 1H), 9.07 (d,  $J = 7.8$  Hz, 1H), 8.43-7.94 (m, 2H), 7.63 (d,  $J = 7.7$  Hz, 1H), 7.60-7.47 (m, 2H), 7.33-7.19 (m, 2H), 7.15 (t,  $J = 7.7$  Hz, 1H), 6.72 (t,  $J = 7.7$  Hz, 1H), 4.70 (s, 2H).  $^{13}\text{C}$  NMR (101 MHz,  $\text{DMSO-}d_6$ ):  $\delta$  143.7, 138.5, 138.3, 137.8, 134.4, 132.2, 131.4, 127.9, 127.5, 126.4, 125.9, 123.9, 122.5, 121.5, 121.2, 120.8, 119.0, 118.5, 117.2, 116.9, 109.5, 108.6, 104.3, 103.9, 56.3, 56.1, 56.0. MS (ESI): 584 ( $\text{M}+\text{H}^+$ , 100). Anal calcd for  $\text{C}_{24}\text{H}_{14}\text{Br}_3\text{N}_3$ : C, 49.35; H, 2.42; N, 7.19. Found C, 49.69; H, 2.16; N, 6.83.

2-(4,11-Dimethoxy-5,12-dihydroindolo[3,2-*a*]carbazol-6-yl)-6-methoxyaniline (**10e**)

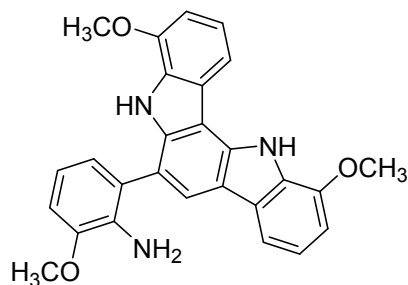

Yellow amorphous solid.  $^1\text{H}$  NMR (400 MHz,  $\text{DMSO-}d_6$ ):  $\delta$  11.40 (s, 1H), 10.39 (s, 1H), 8.14 (s, 1H), 7.77 (d,  $J = 7.8$  Hz, 1H), 7.44 (d,  $J = 8.4$  Hz, 1H), 7.16 (t,  $J = 7.8$  Hz, 1H), 7.00-7.92 (m, 4H), 6.90 (dd,  $J = 7.8, 1.0$  Hz, 1H), 6.78 (t,  $J = 7.8$  Hz, 1H), 4.33 (s, 2H), 4.04 (s, 3H), 3.95 (s, 3H), 3.89 (s, 3H).  $^{13}\text{C}$  NMR (101 MHz,  $\text{DMSO-}d_6$ ):  $\delta$  147.5, 146.1, 145.8, 137.7, 135.2, 131.9, 131.2, 128.0, 124.8, 124.3, 124.2, 124.1, 122.7, 121.3, 120.7, 117.4, 117.1, 117.0, 112.4, 110.2, 107.4, 106.6, 105.5, 104.0, 56.3, 56.1, 56.0. MS (ESI): 438 ( $\text{M}+\text{H}^+$ , 100). Anal calcd for  $\text{C}_{27}\text{H}_{23}\text{N}_3\text{O}_3$ : C, 74.13; H, 5.30; N, 9.60. Found C, 73.85; H, 5.21; N, 9.29.

2-(Benzyloxy)-6-(4,11-bis(benzyloxy)-5,12-dihydroindolo[3,2-*a*]carbazol-6-yl)aniline (**10f**)

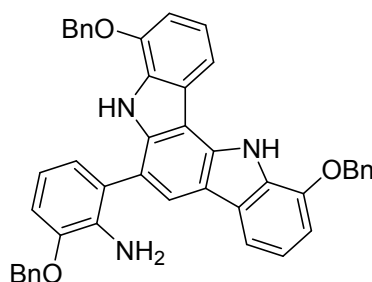

Yellow amorphous solid.  $^1\text{H}$  NMR (400 MHz,  $\text{DMSO-}d_6$ ):  $\delta$  11.50 (s, 1H), 11.15 (s, 1H), 8.12 (dd,  $J = 5.0, 2.6$  Hz, 1H), 7.60-7.55 (m, 8H), 7.44-7.33 (m, 9H), 7.12 (t,  $J = 8.1$  Hz, 1H), 7.06 (d,  $J = 8.1$  Hz, 2H), 6.88-6.85 (m, 2H), 6.77 (d,  $J = 1.9$  Hz, 1H), 6.67 (d,  $J = 7.8$  Hz, 1H), 5.35-5.27 (m, 8H).  $^{13}\text{C}$  NMR (101 MHz,  $\text{DMSO-}d_6$ ):  $\delta$  145.9, 145.8, 145.0, 144.6, 138.1, 137.8, 137.7, 137.6, 135.8, 134.7, 131.4, 128.9, 128.8, 128.3, 128.2, 128.1, 128.0, 127.9, 127.4, 127.0, 126.9, 126.5, 124.8, 124.2, 121.1, 120.8, 119.8, 113.1, 112.8, 109.2, 108.4, 104.9, 104.0, 103.4, 98.1, 97.6, 70.0, 69.7, 69.6. MS (ESI): 666 ( $\text{M}+\text{H}^+$ , 100). Anal calcd for  $\text{C}_{45}\text{H}_{35}\text{N}_3\text{O}_3$ : C, 81.18; H, 5.30; N, 6.31. Found C, 80.83; H, 5.09; N, 6.12.

### 3.5 General Procedure for the Preparation of 11.

To a solution of indole (0.3 mmol) and morpholine (0.6 mmol) in  $\text{CH}_3\text{CN}$  (1 mL) was added NBS (0.24 mmol) under an air atmosphere and the mixture was stirred at room temperature for 3 h. The reaction mixture was concentrated under reduced pressure. The residue was purified by flash chromatography on silica gel (eluent:  $\text{EtOAc/PE} = 1:4$ ) to yield the corresponding product **11**.

### 3.6 Spectroscopic Data of the Products 11.

3-Bromo-1*H*-indole (**11**)

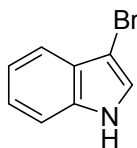

White amorphous solid.  $^1\text{H}$  NMR (400 MHz,  $\text{DMSO-}d_6$ ):  $\delta$  11.45 (s, 1H), 7.52 (d,  $J = 2.6$  Hz, 1H), 7.40 (t,  $J = 8.2$  Hz, 2H), 7.18-7.14 (m, 1H), 7.11-7.07 (m, 1H).  $^{13}\text{C}$  NMR (101 MHz,  $\text{DMSO-}d_6$ ):  $\delta$  135.8, 126.5, 125.2, 122.6, 120.3, 118.3, 112.5, 89.1.

#### 4. Copies of $^1\text{H}$ , $^{13}\text{C}$ Spectra

$^1\text{H}$  and  $^{13}\text{C}$  NMR Spectra for **6a**

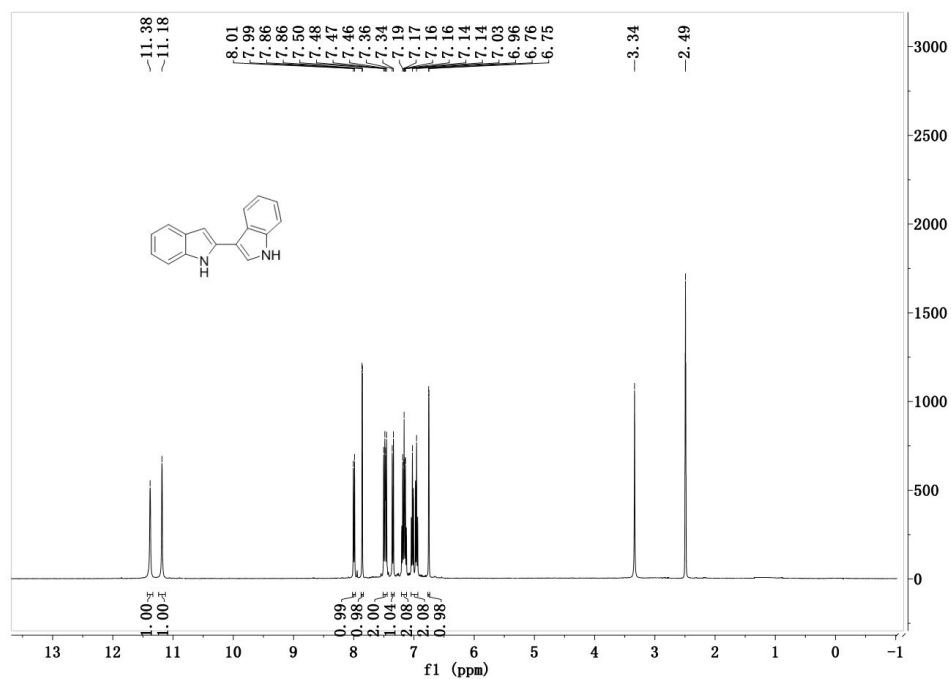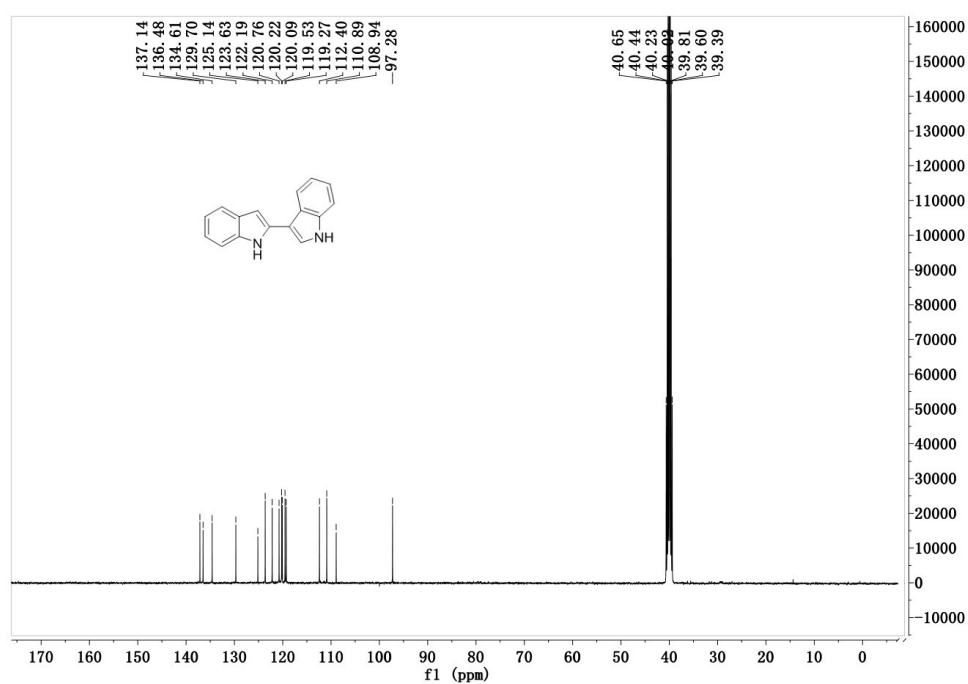

# <sup>1</sup>H and <sup>13</sup>C NMR Spectra for 6b

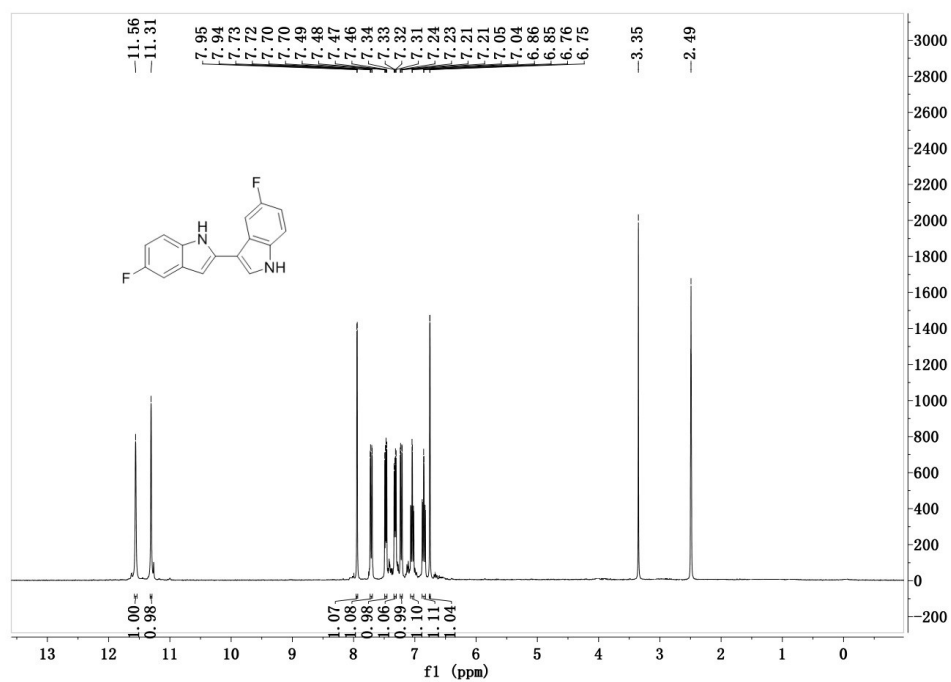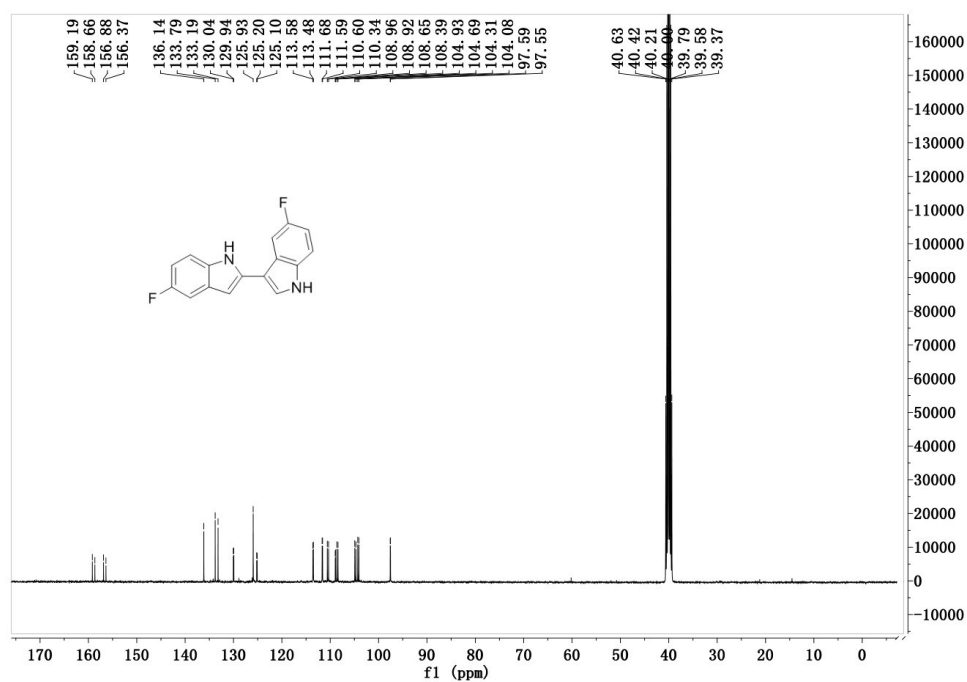

# $^1\text{H}$ and $^{13}\text{C}$ NMR Spectra for 6c

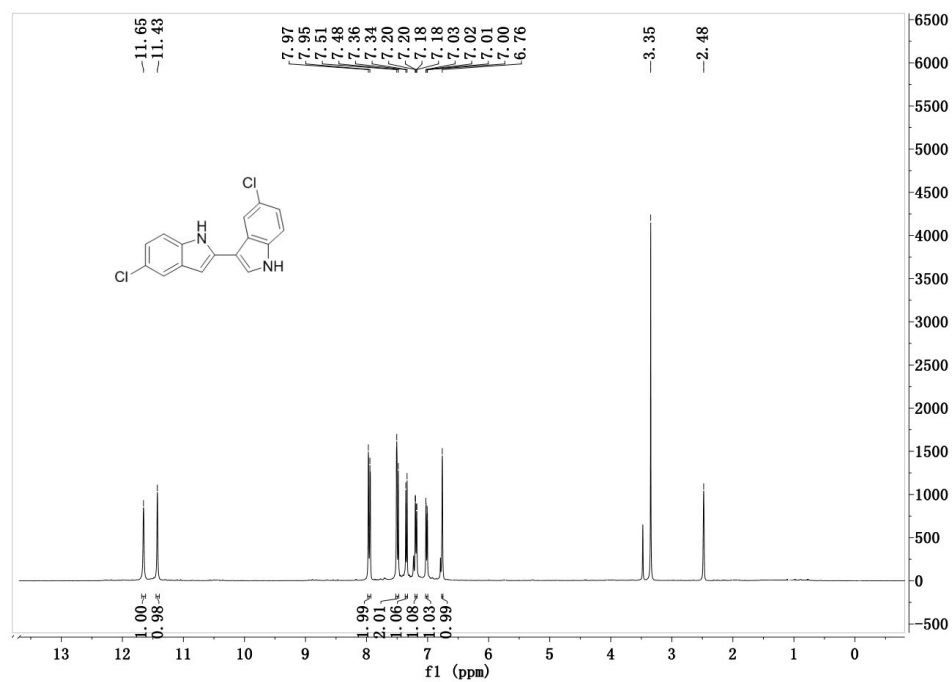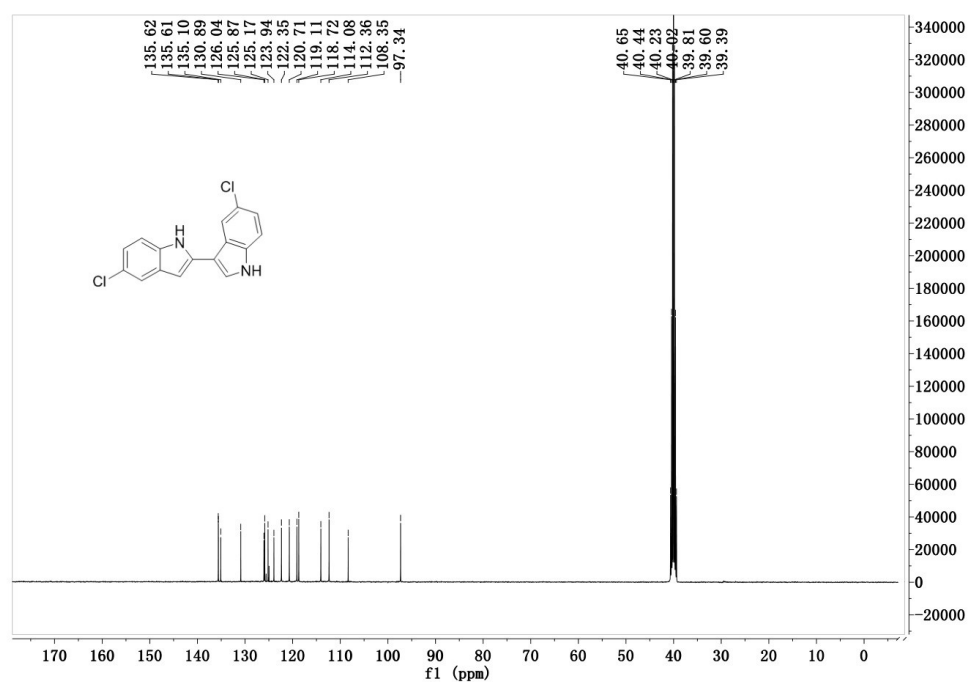

# <sup>1</sup>H and <sup>13</sup>C NMR Spectra for **6d**

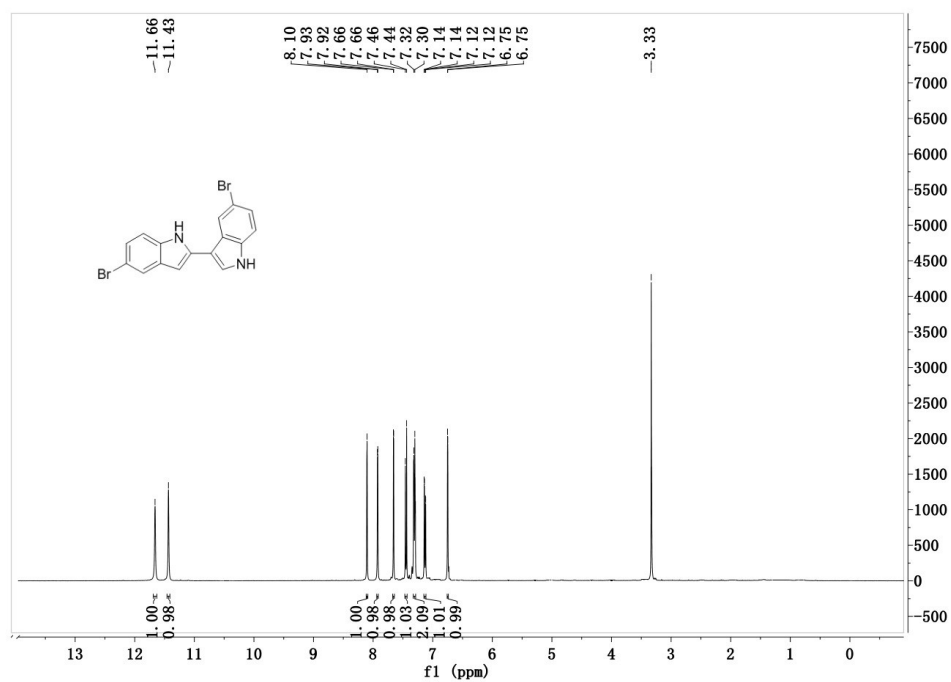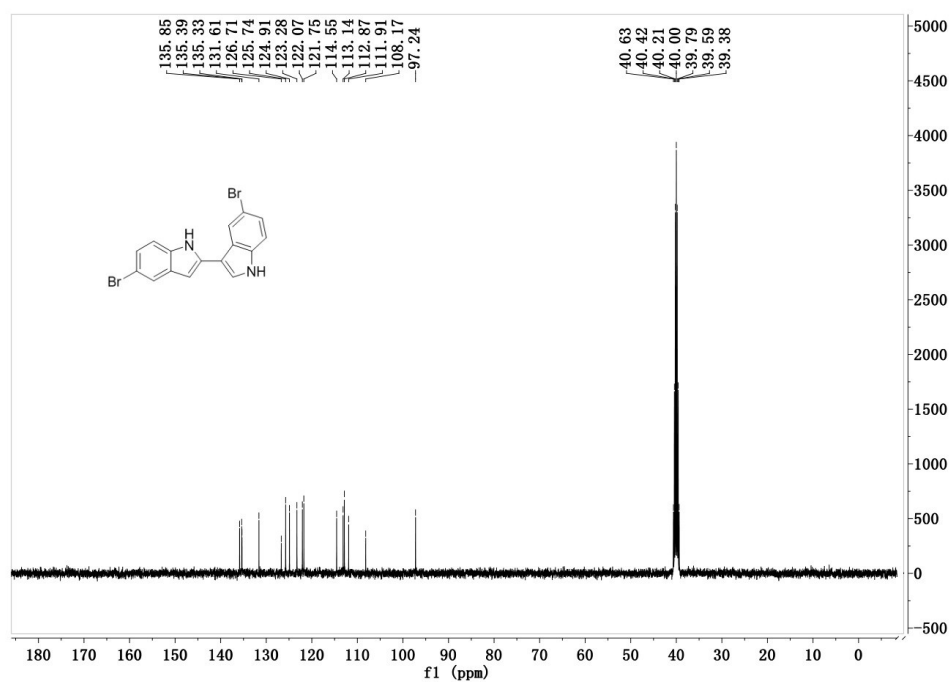

# <sup>1</sup>H and <sup>13</sup>C NMR Spectra for 6e

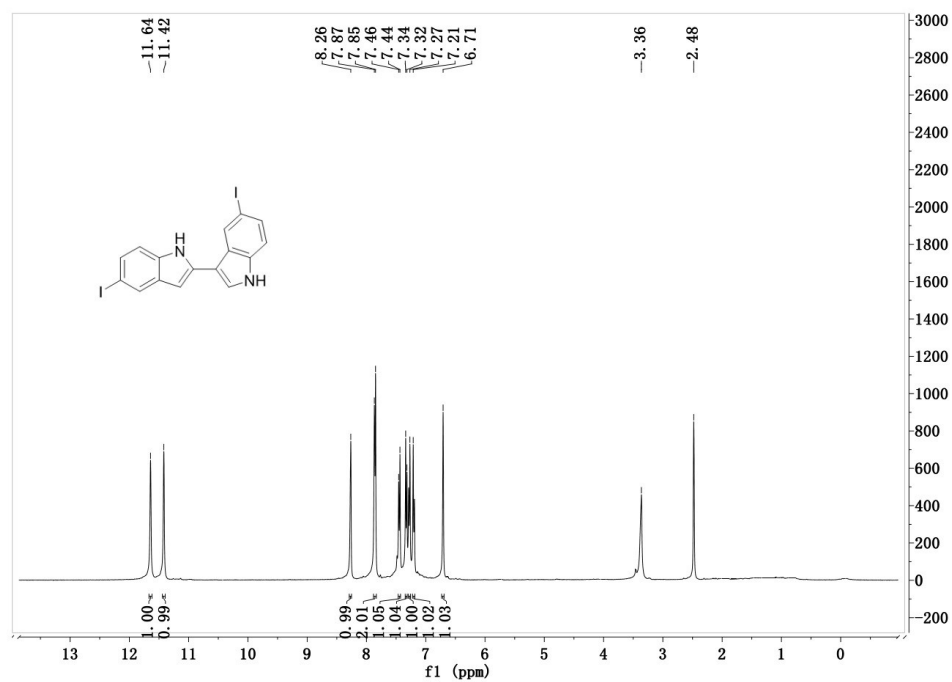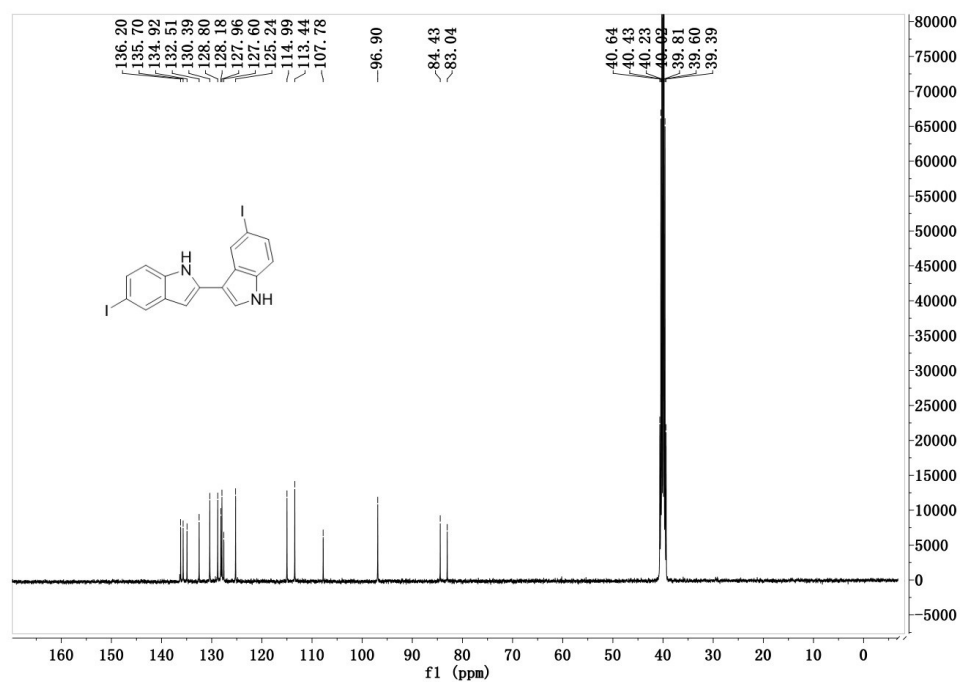

# $^1\text{H}$ and $^{13}\text{C}$ NMR Spectra for **6f**

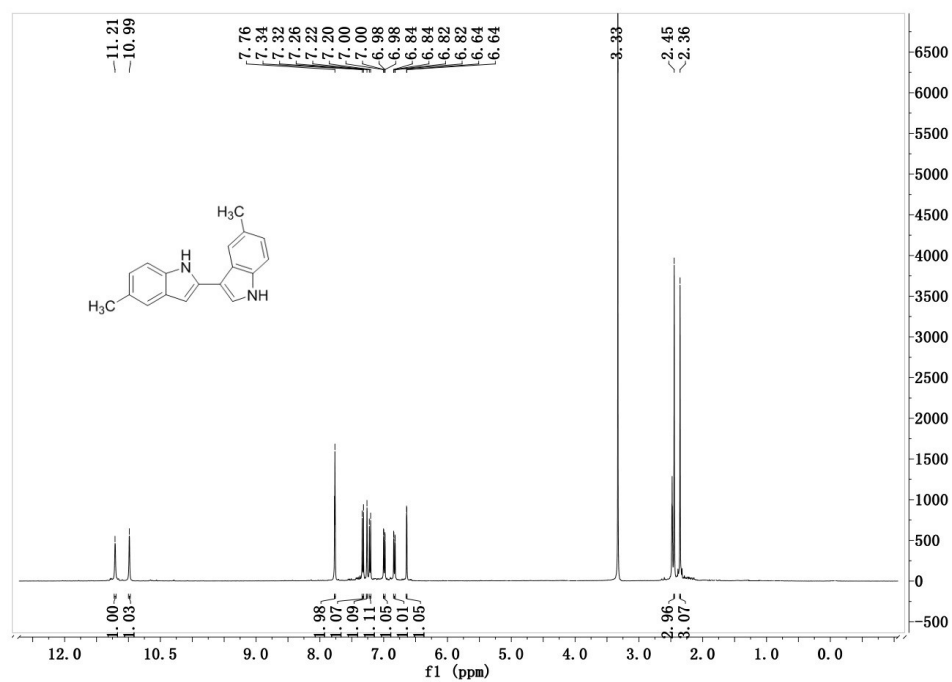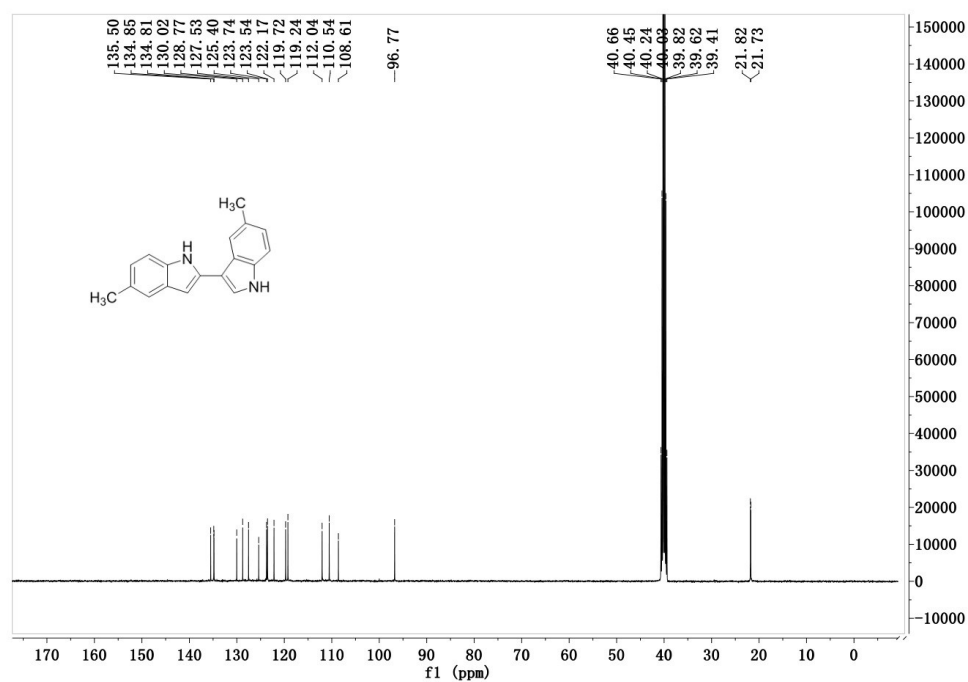



# <sup>1</sup>H and <sup>13</sup>C NMR Spectra for 6g

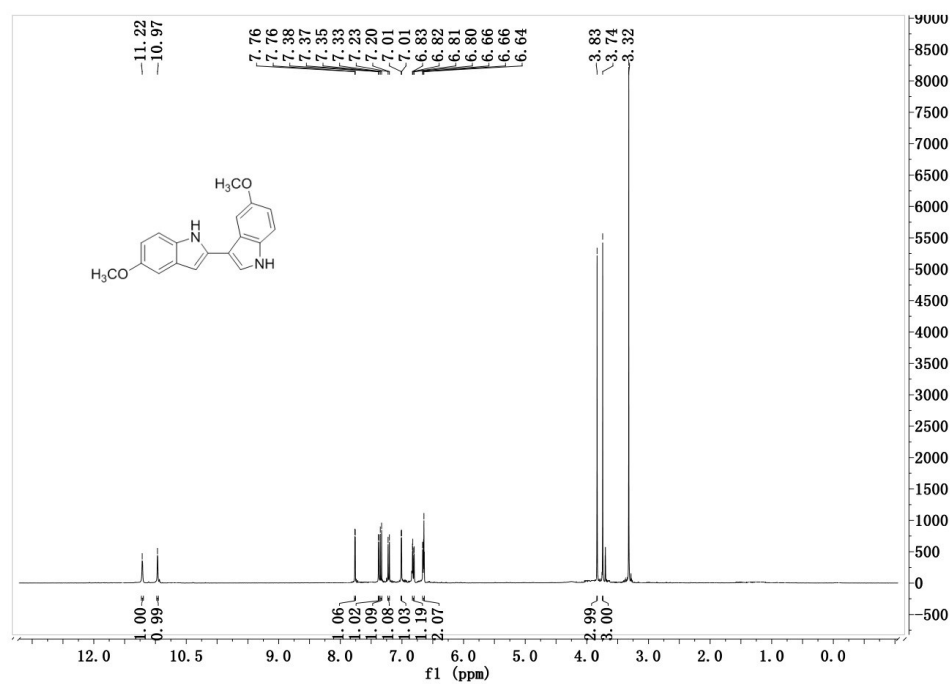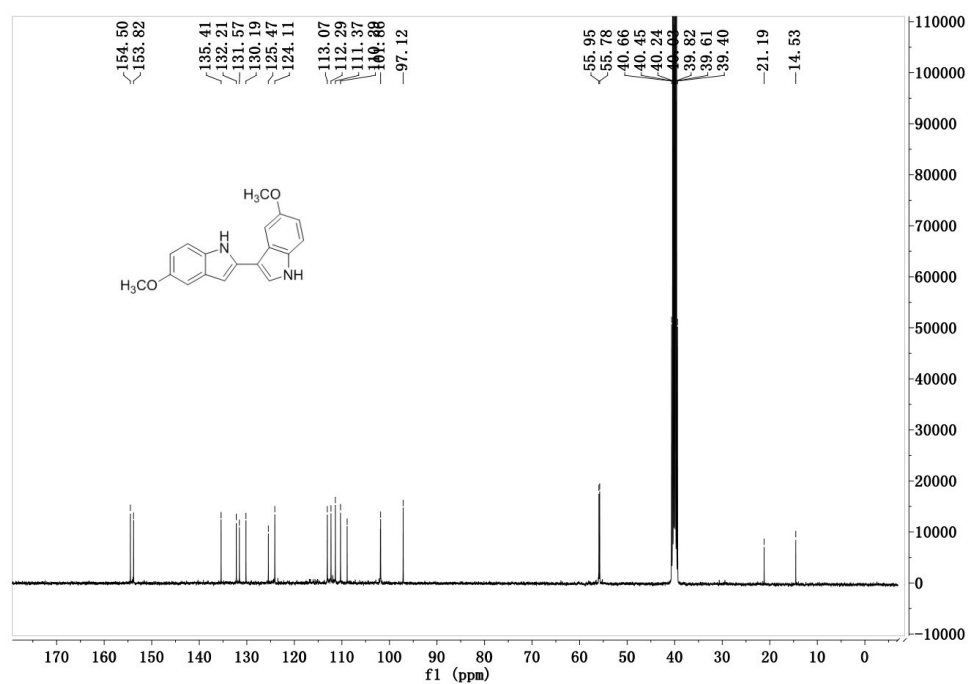

# <sup>1</sup>H and <sup>13</sup>C NMR Spectra for 6h

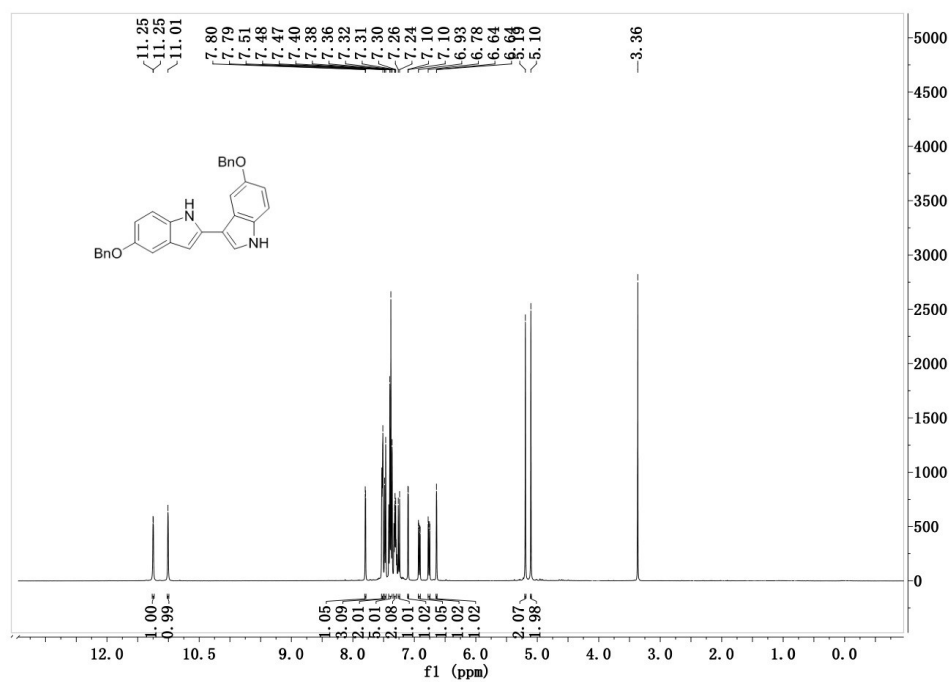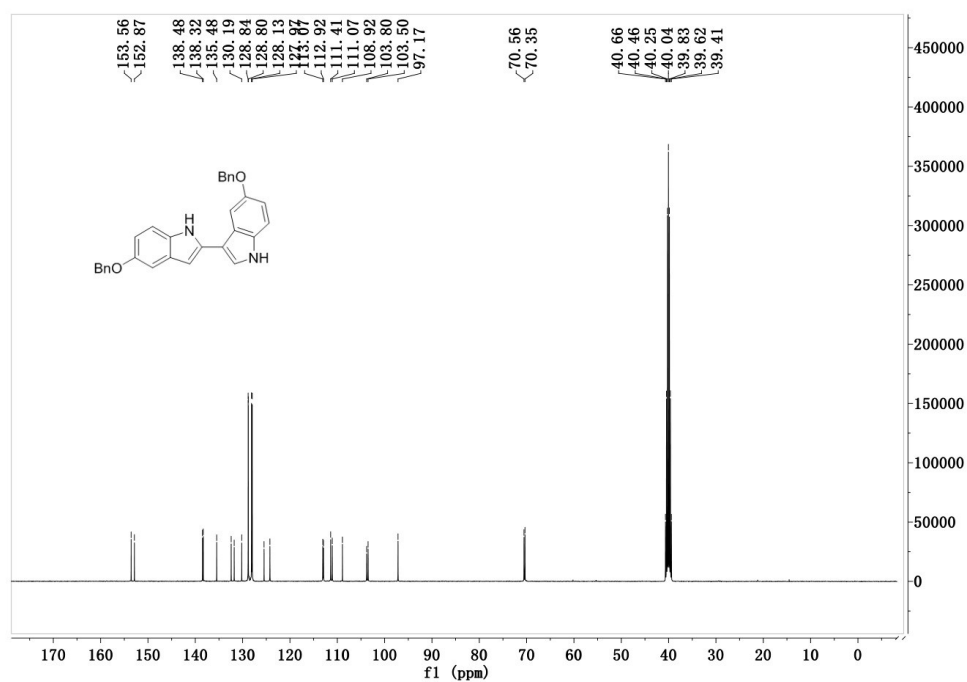

<sup>1</sup>H and <sup>13</sup>C NMR Spectra for **6i**

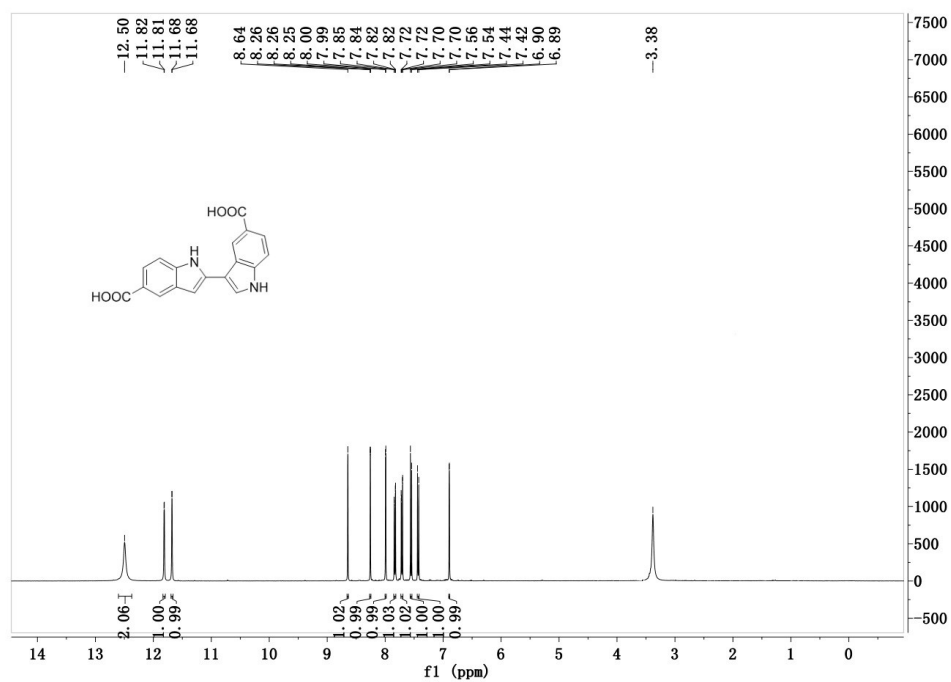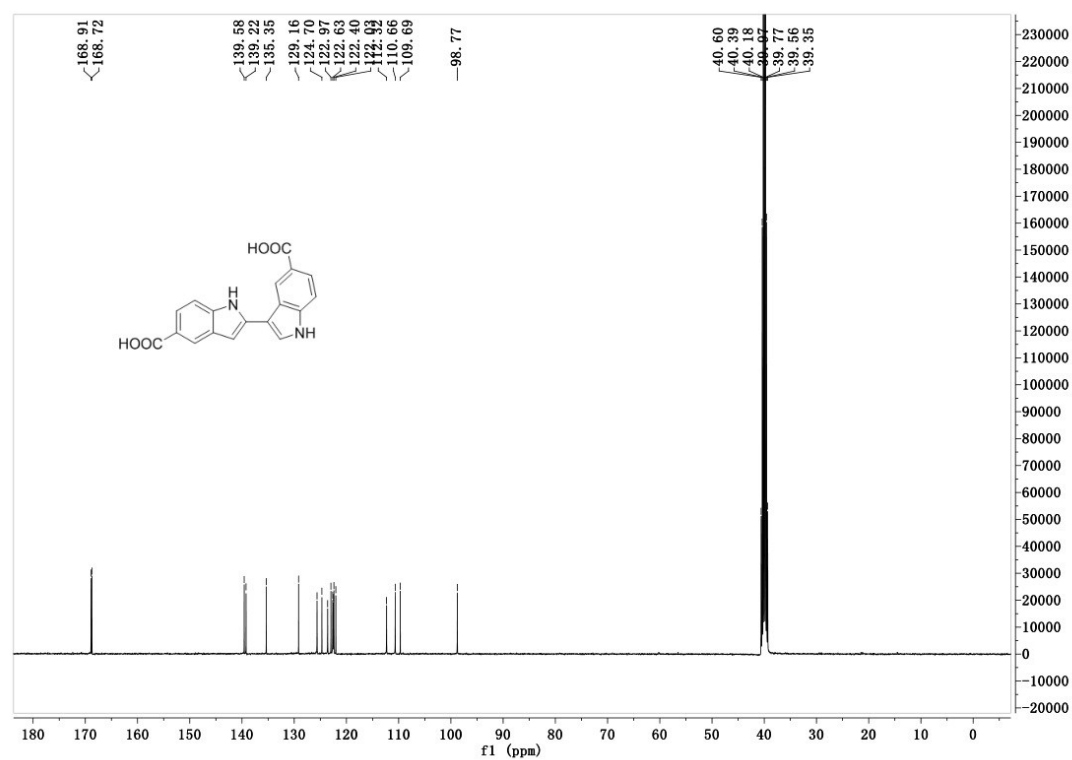

# $^1\text{H}$ and $^{13}\text{C}$ NMR Spectra for **6j**

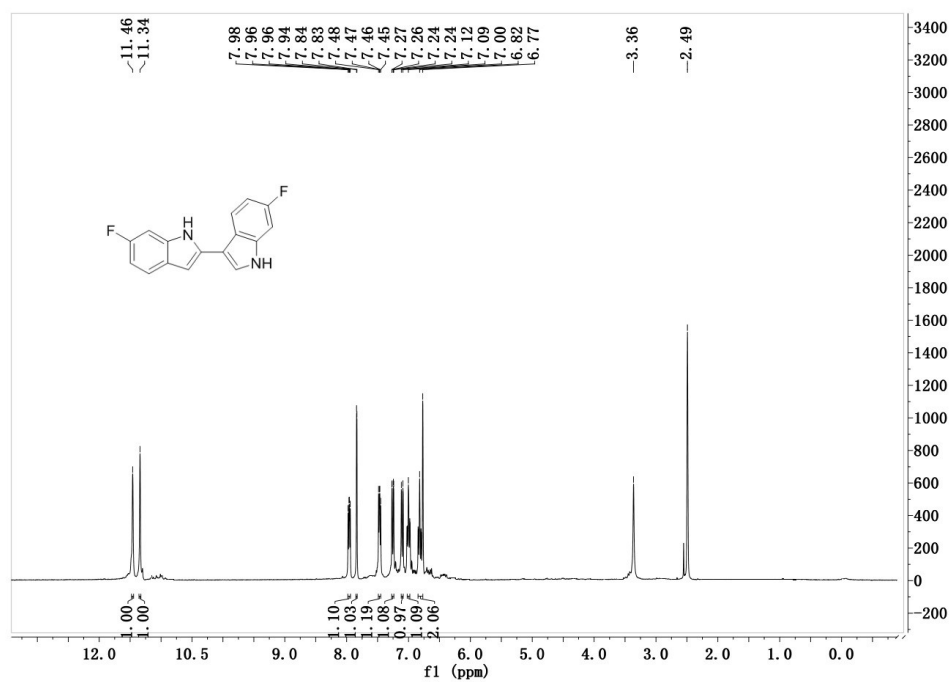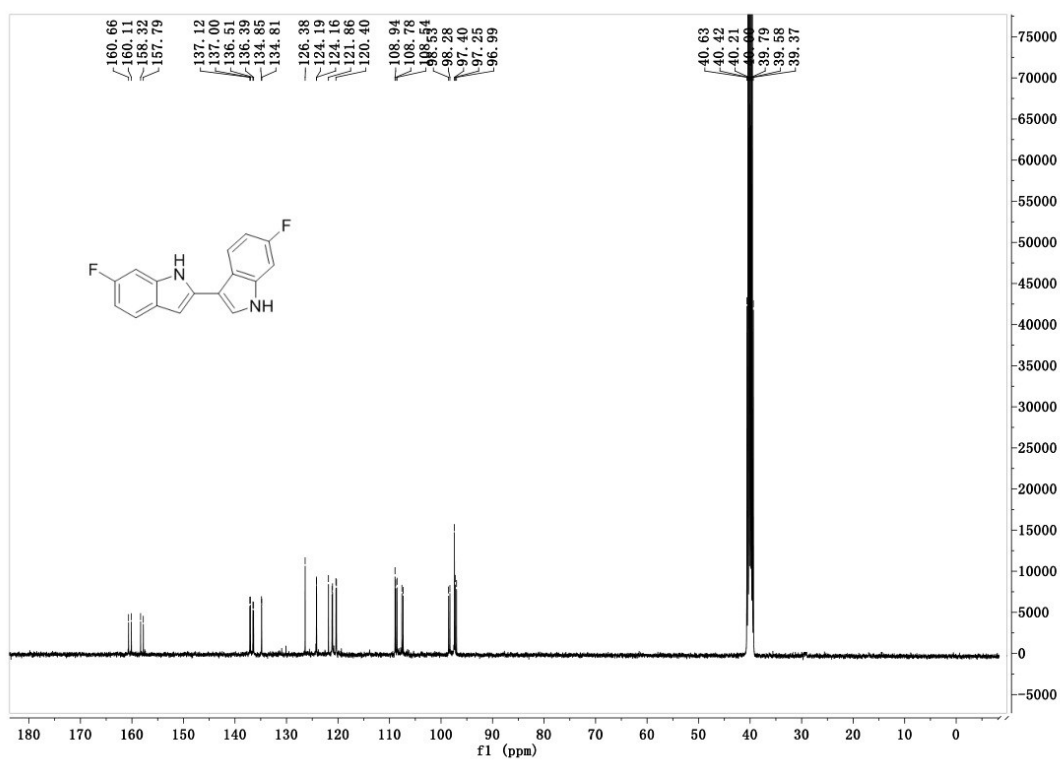

# <sup>1</sup>H and <sup>13</sup>C NMR Spectra for 6k

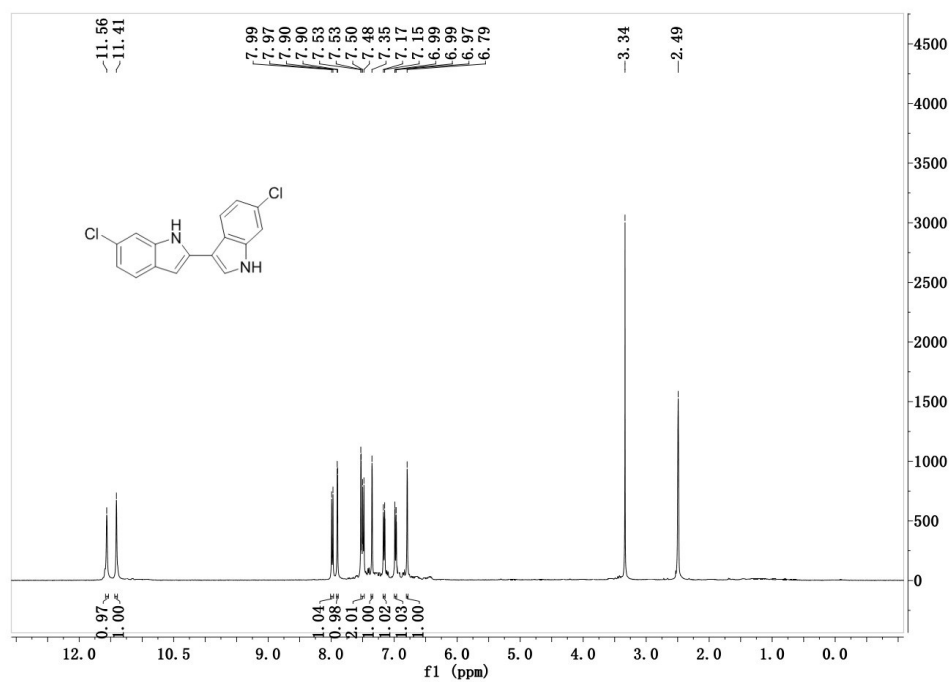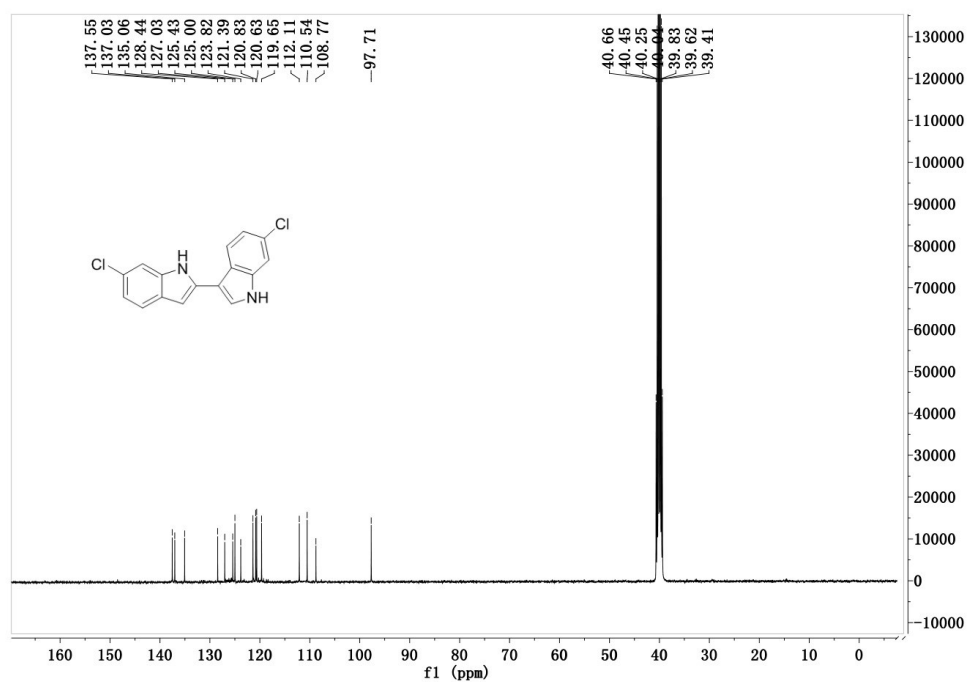

# <sup>1</sup>H and <sup>13</sup>C NMR Spectra for **61**

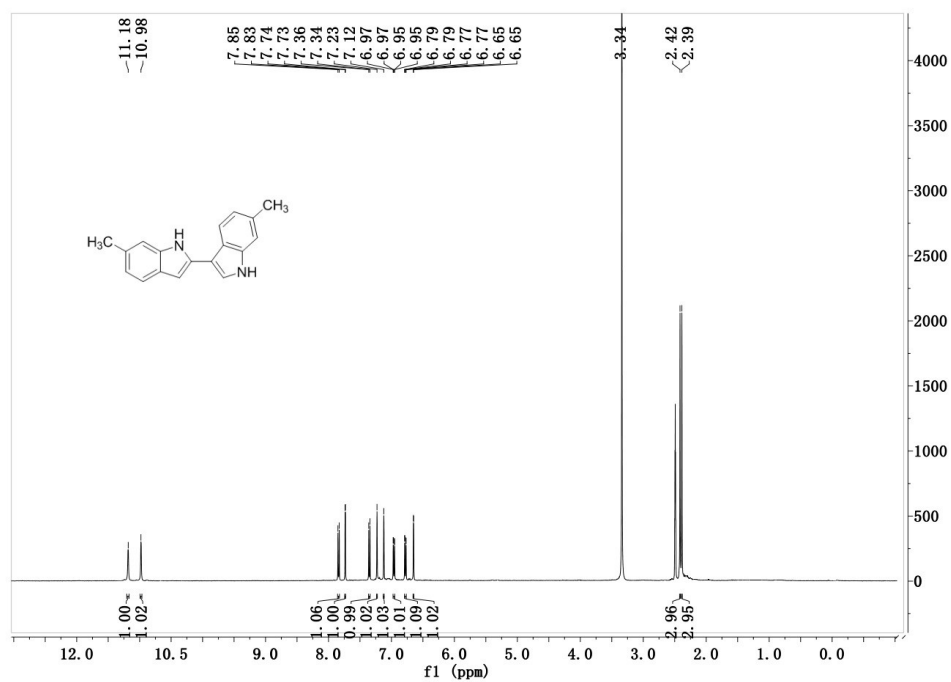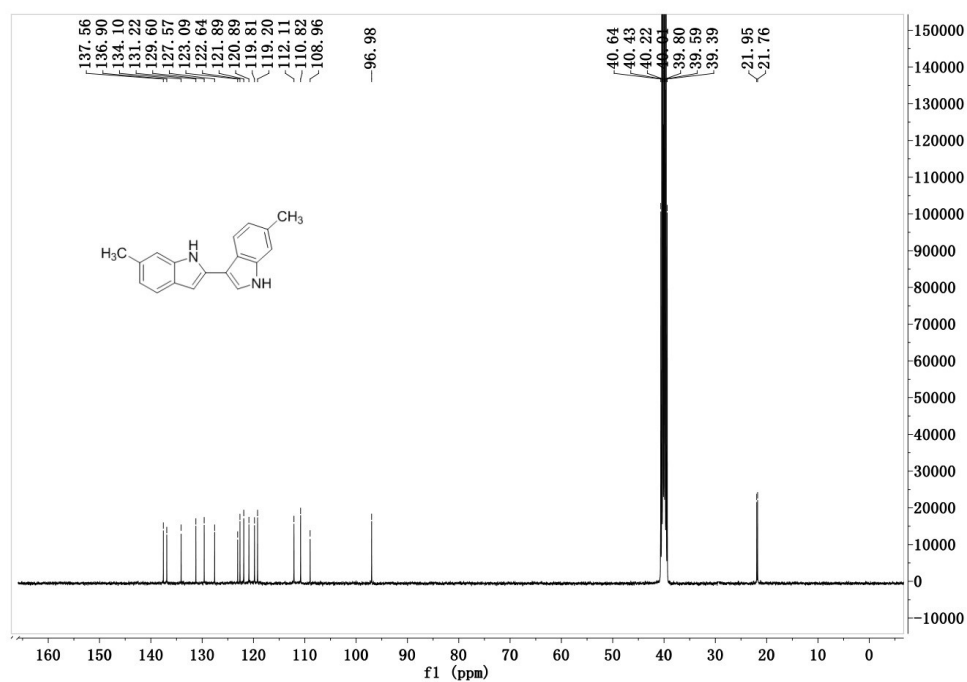

# <sup>1</sup>H and <sup>13</sup>C NMR Spectra for 6m

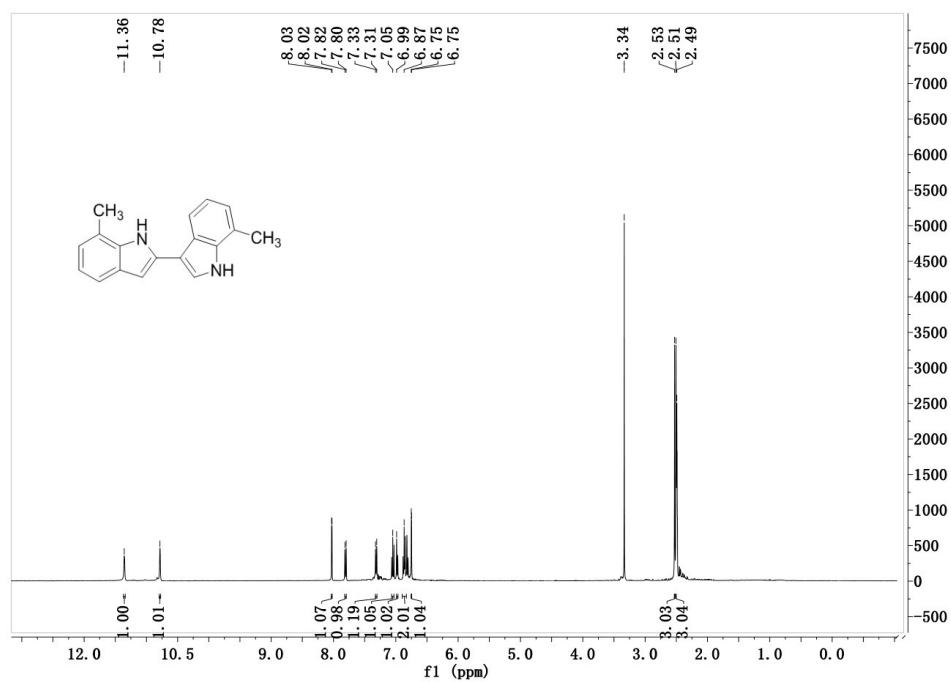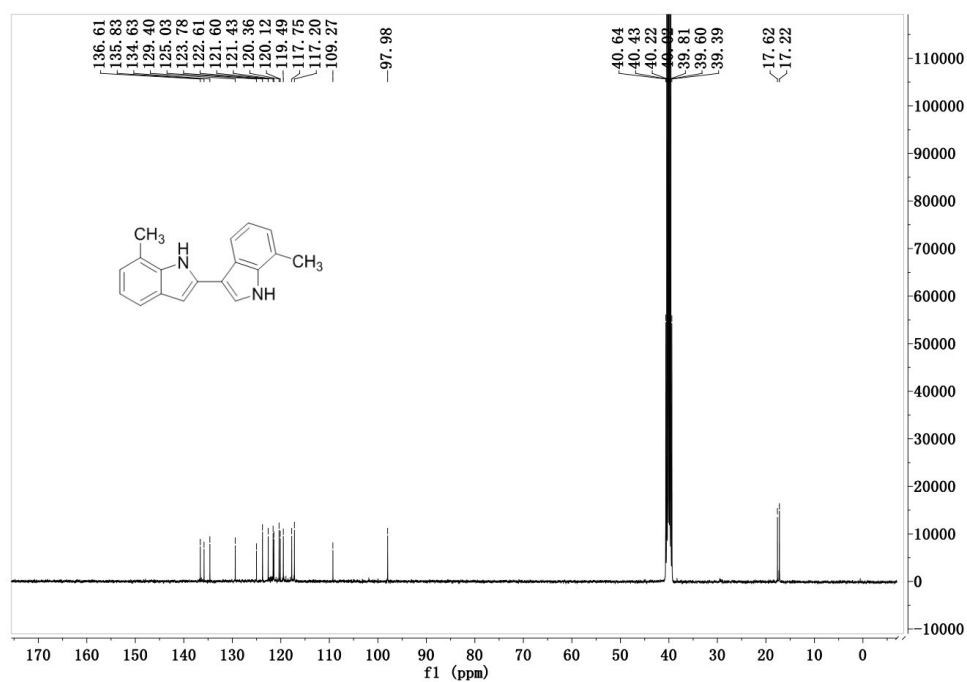

# <sup>1</sup>H and <sup>13</sup>C NMR Spectra for 6n

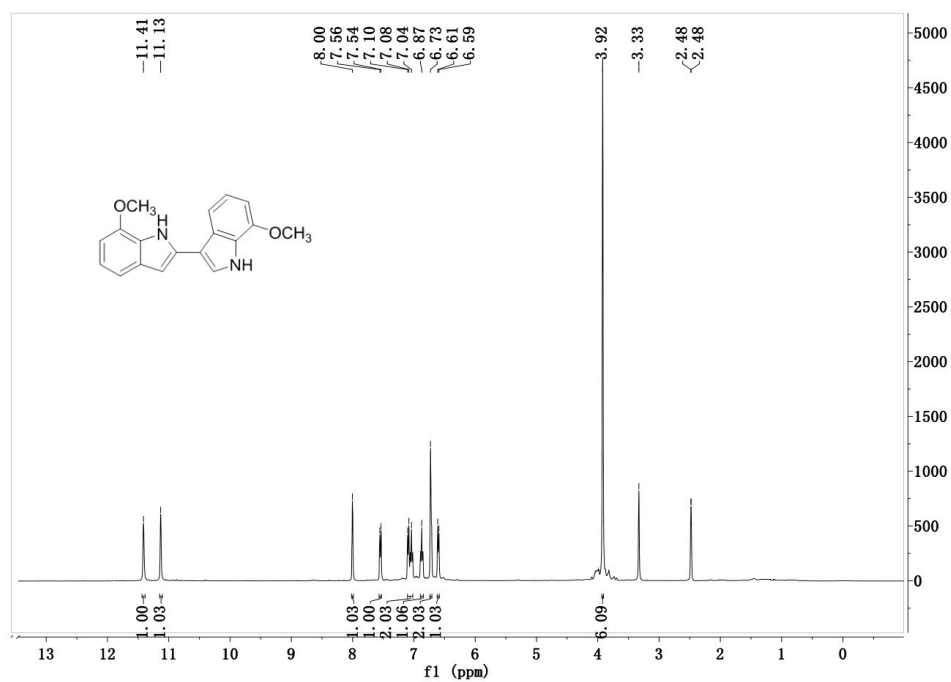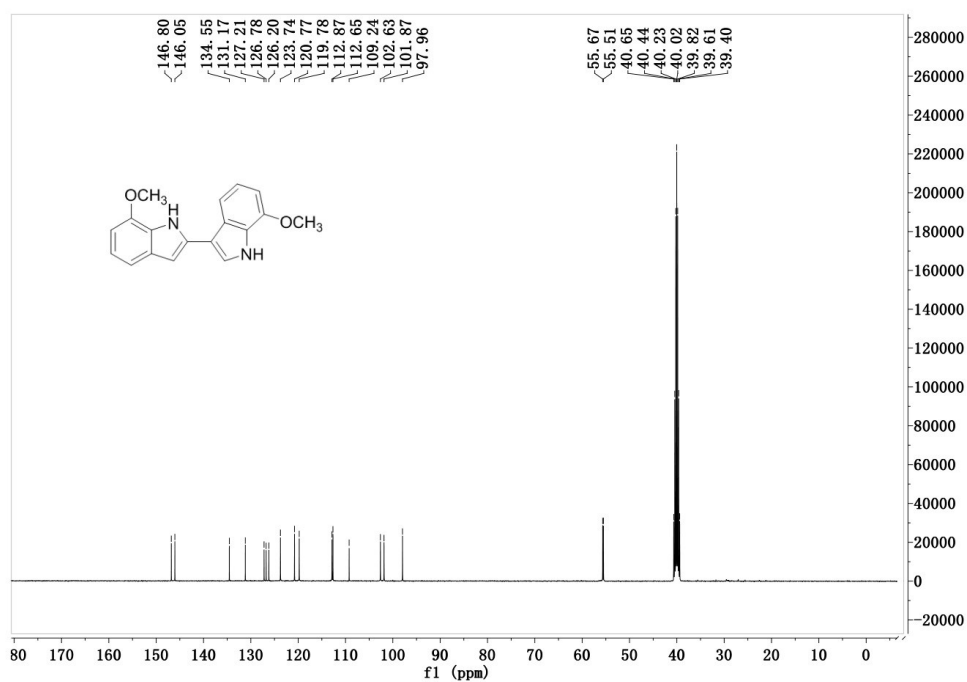



# $^1\text{H}$ and $^{13}\text{C}$ NMR Spectra for **60**

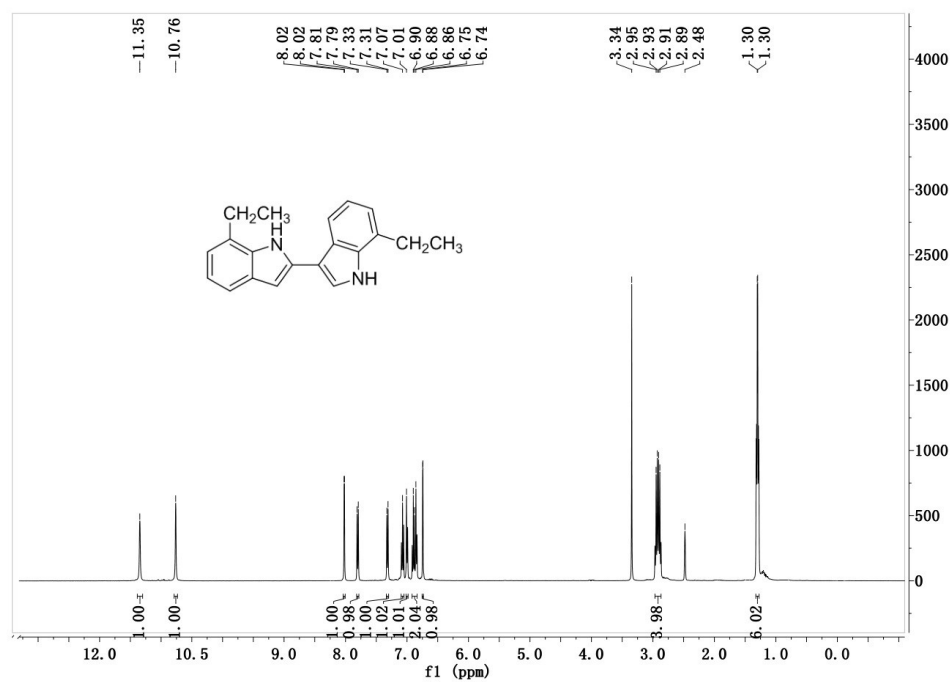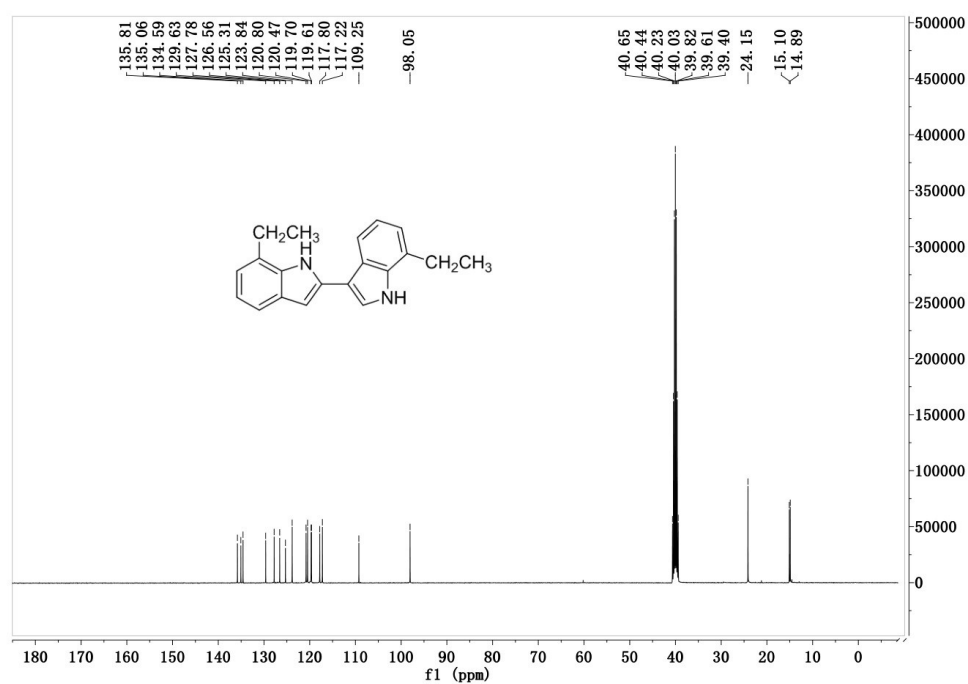

<sup>1</sup>H and <sup>13</sup>C NMR Spectra for **6p**

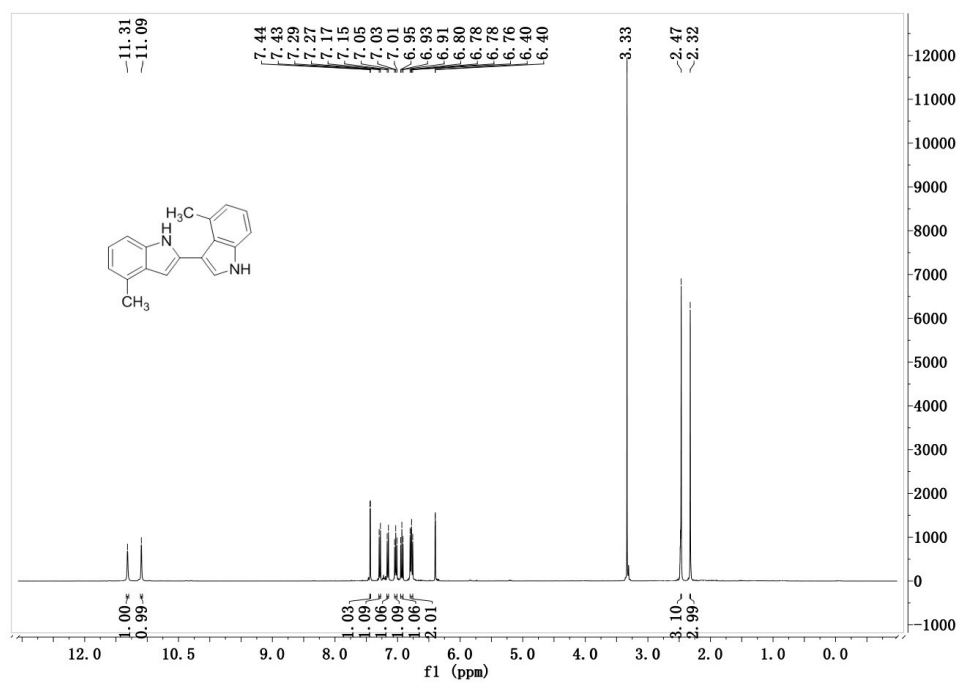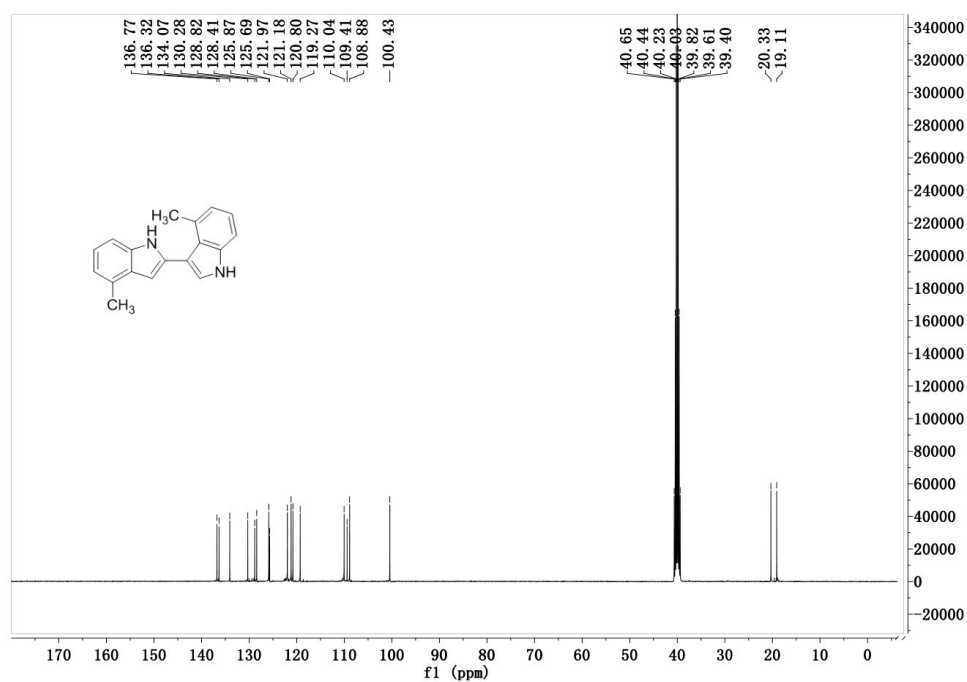

$^1\text{H}$  and  $^{13}\text{C}$  NMR Spectra for **6q**

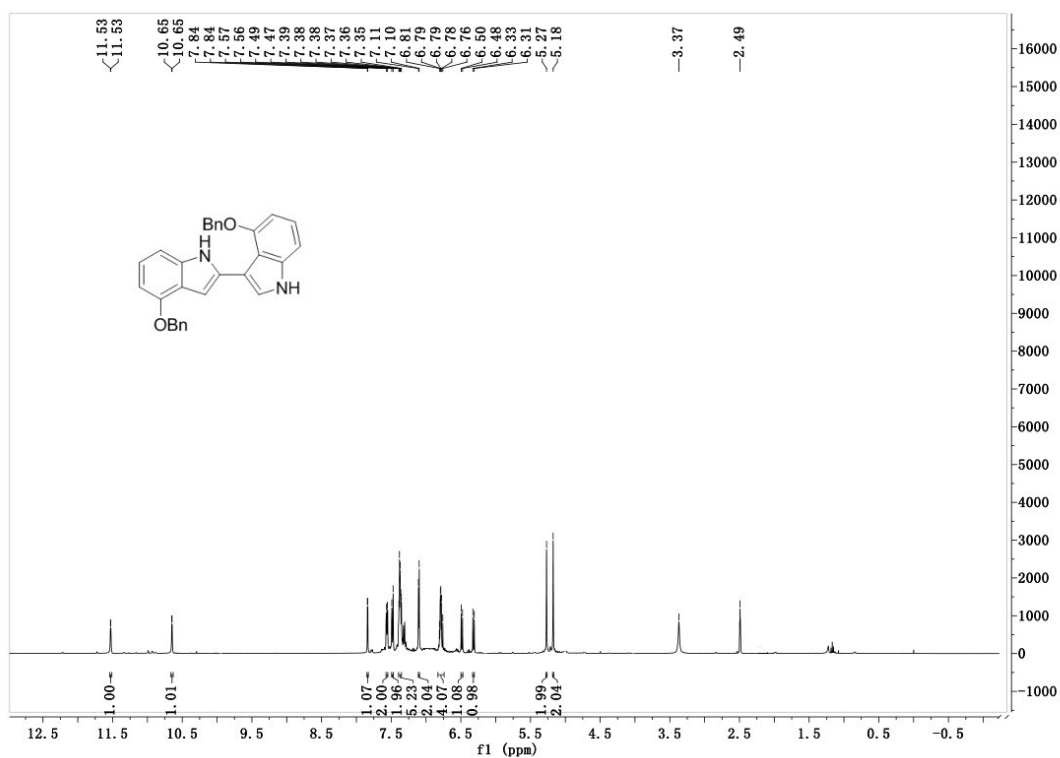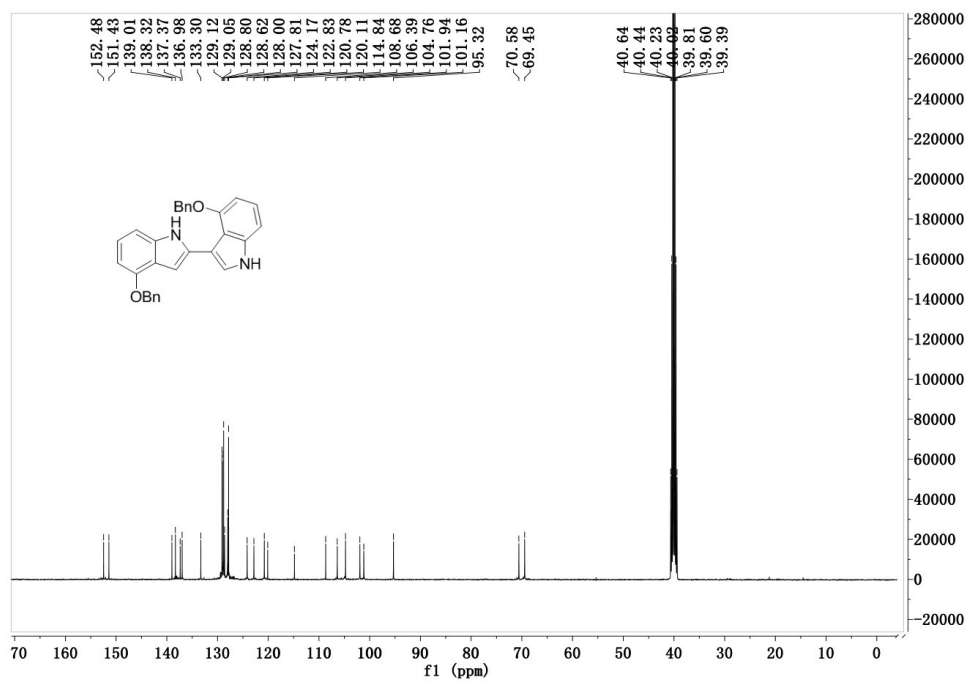

# $^1\text{H}$ and $^{13}\text{C}$ NMR Spectra for **6r**

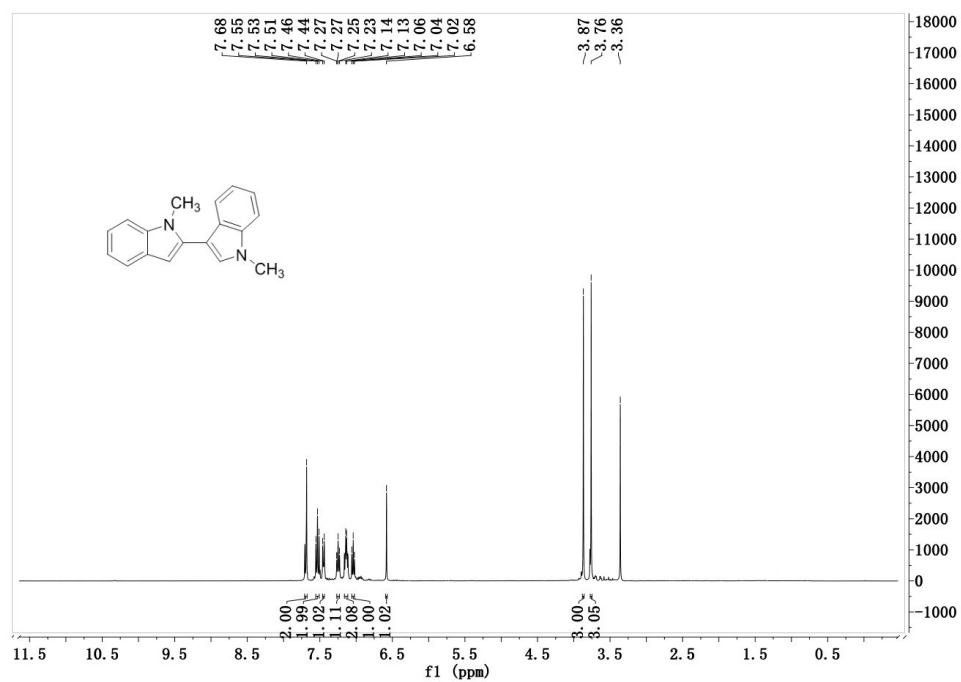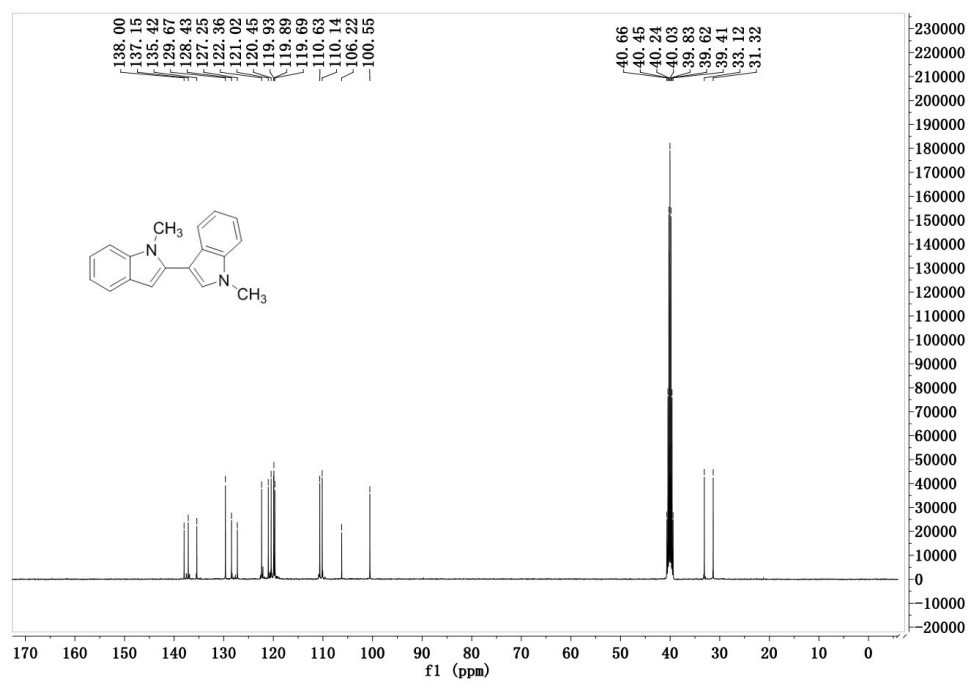

# <sup>1</sup>H and <sup>13</sup>C NMR Spectra for **9**

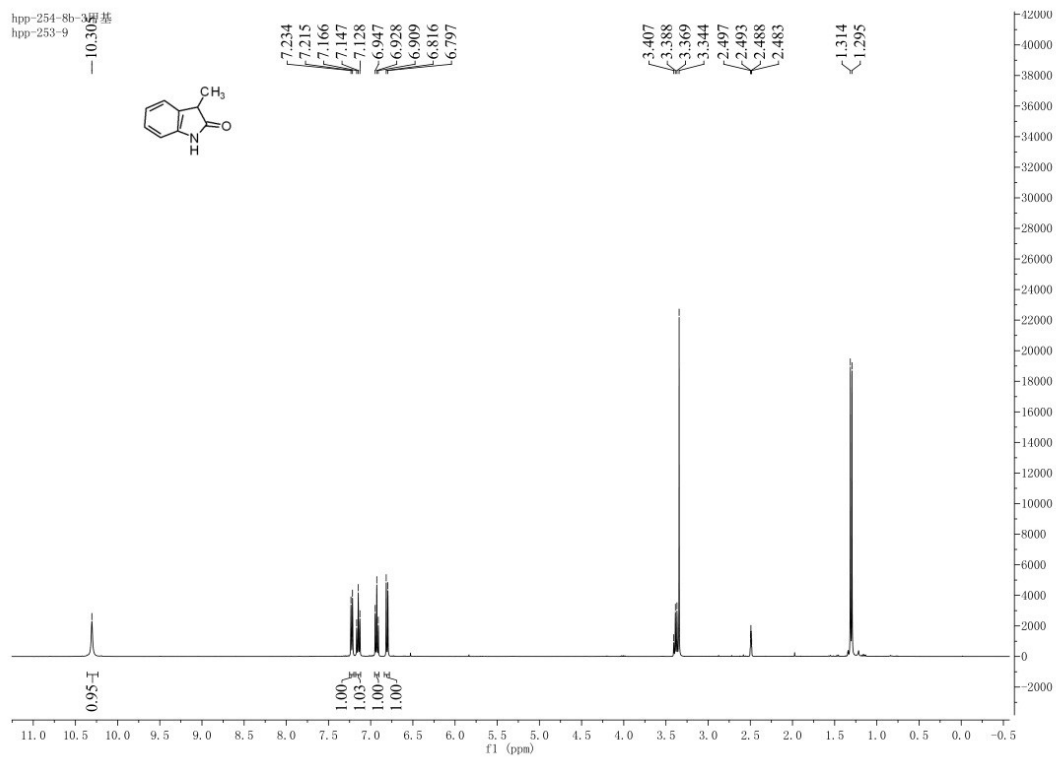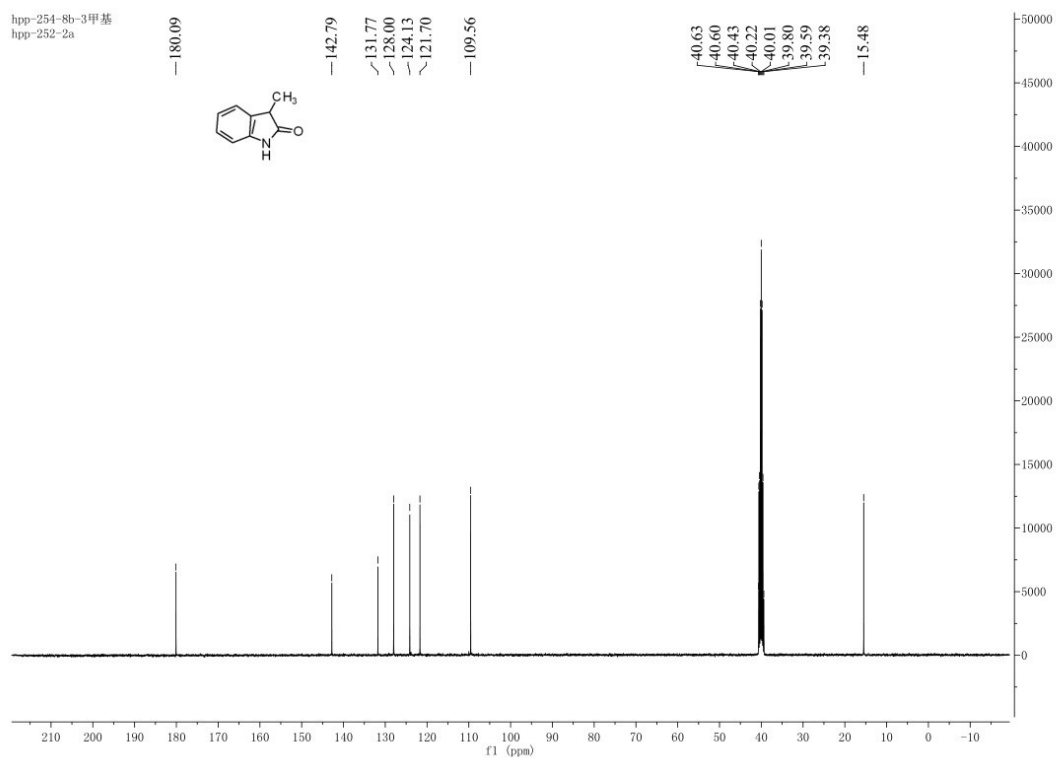

$^1\text{H}$  and  $^{13}\text{C}$  NMR Spectra for **10a**

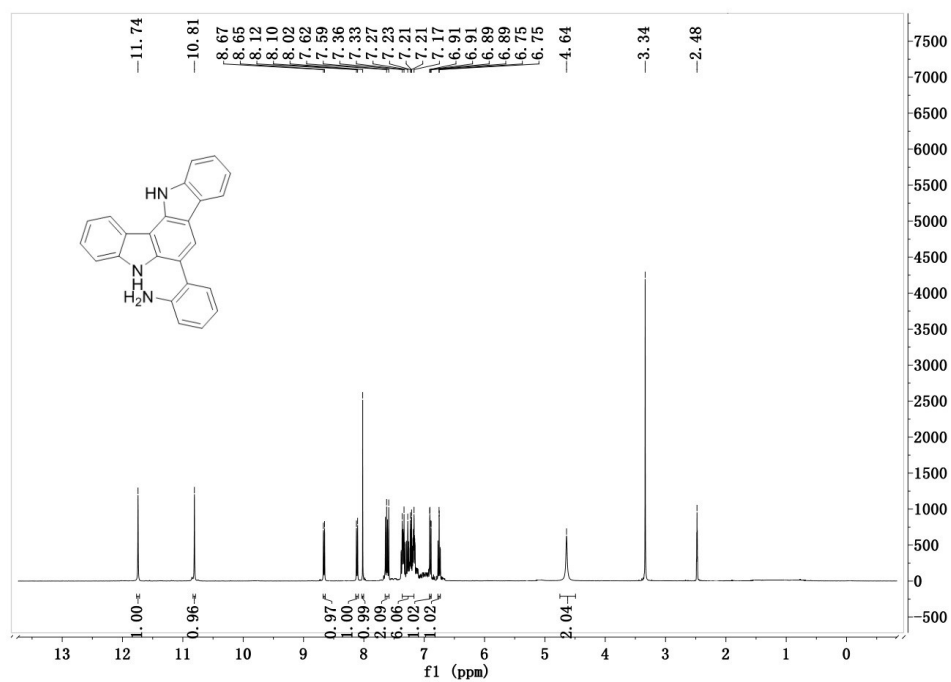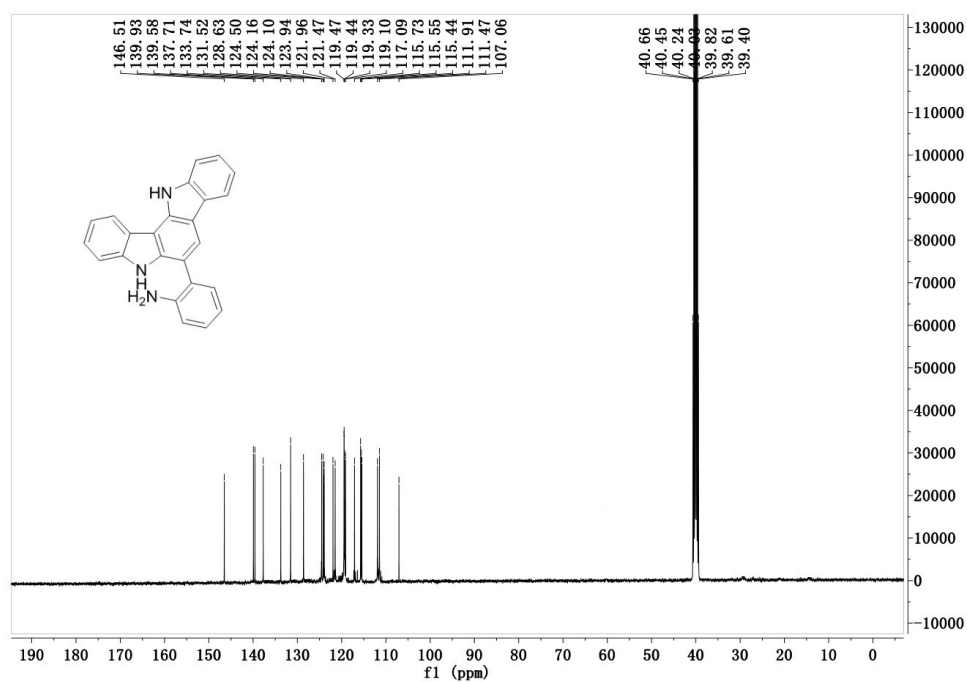

# <sup>1</sup>H and <sup>13</sup>C NMR Spectra for **10b**

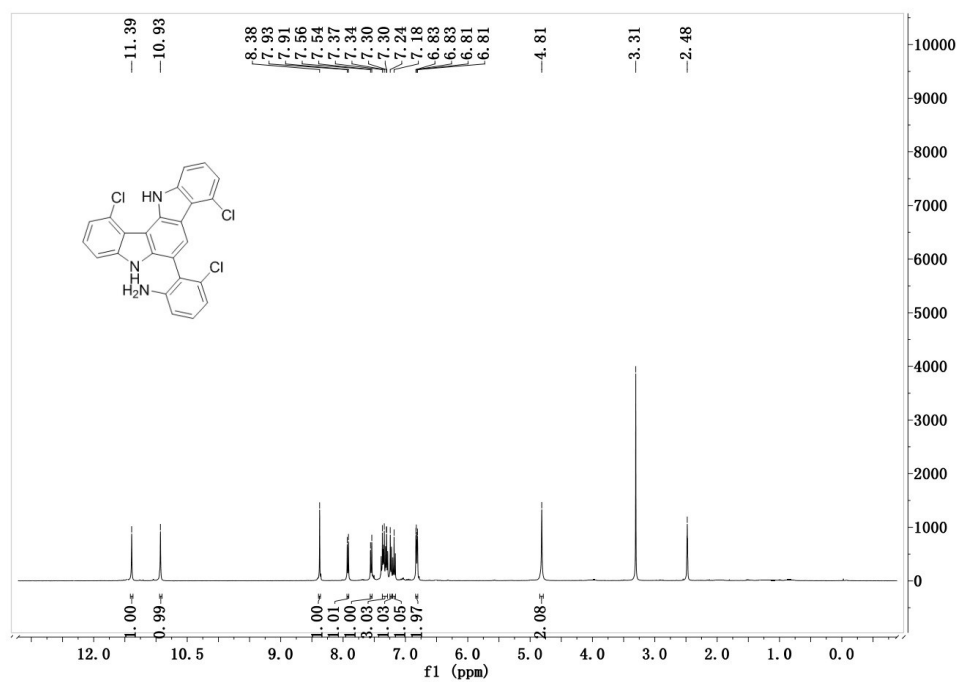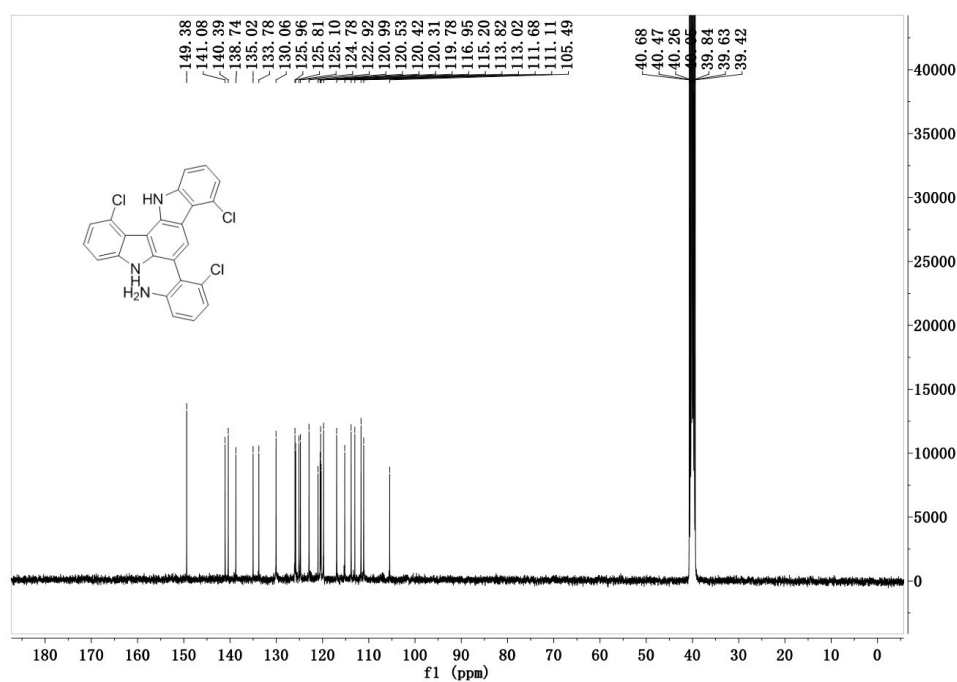

$^1\text{H}$  and  $^{13}\text{C}$  NMR Spectra for **10c**

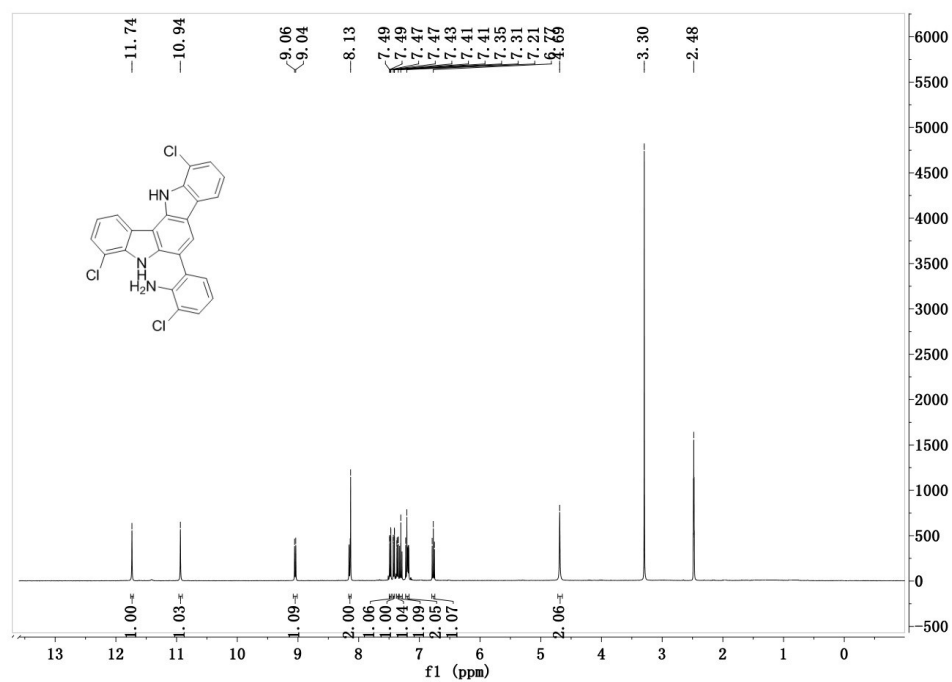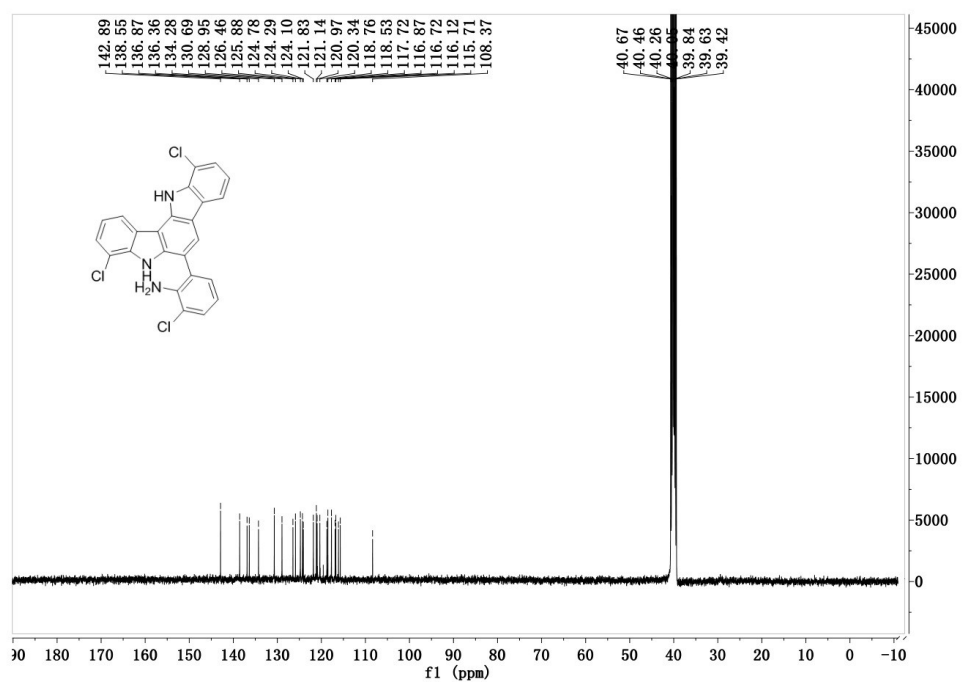



$^1\text{H}$  and  $^{13}\text{C}$  NMR Spectra for **10d**

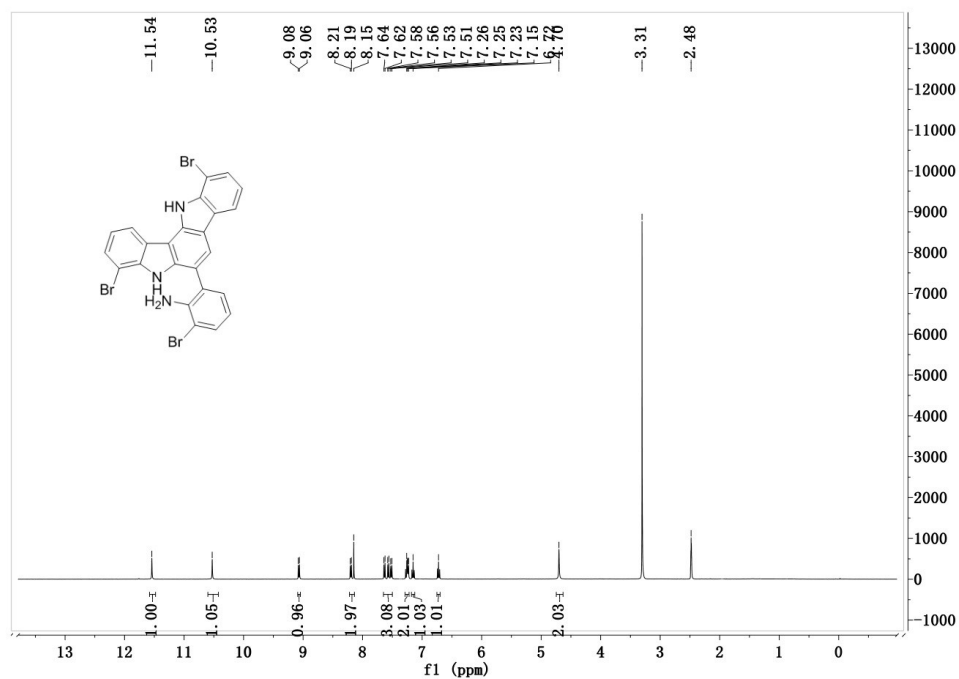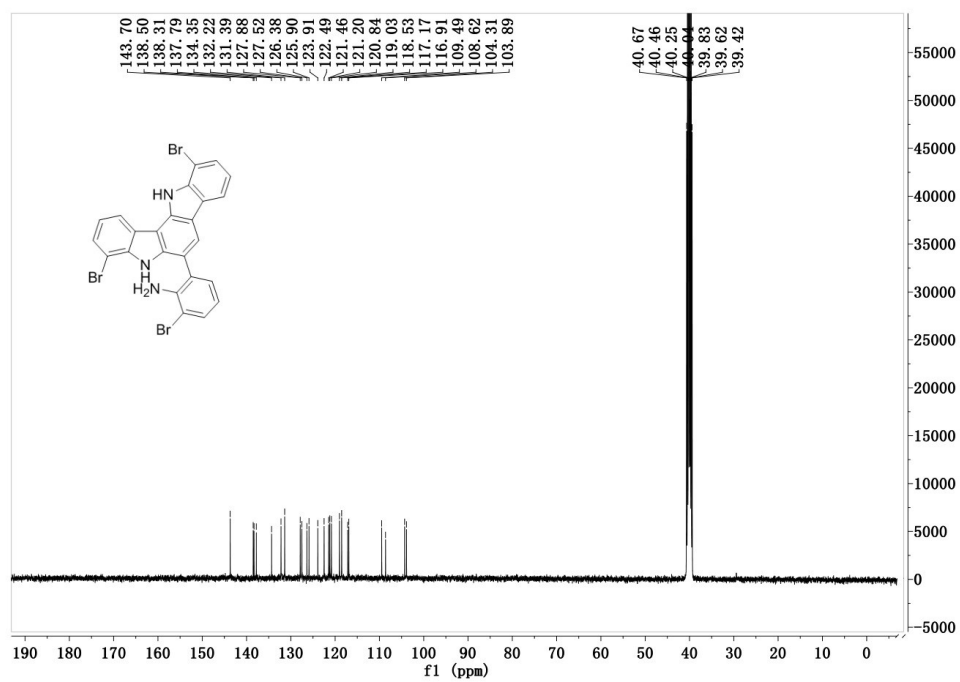

# <sup>1</sup>H and <sup>13</sup>C NMR Spectra for 10e

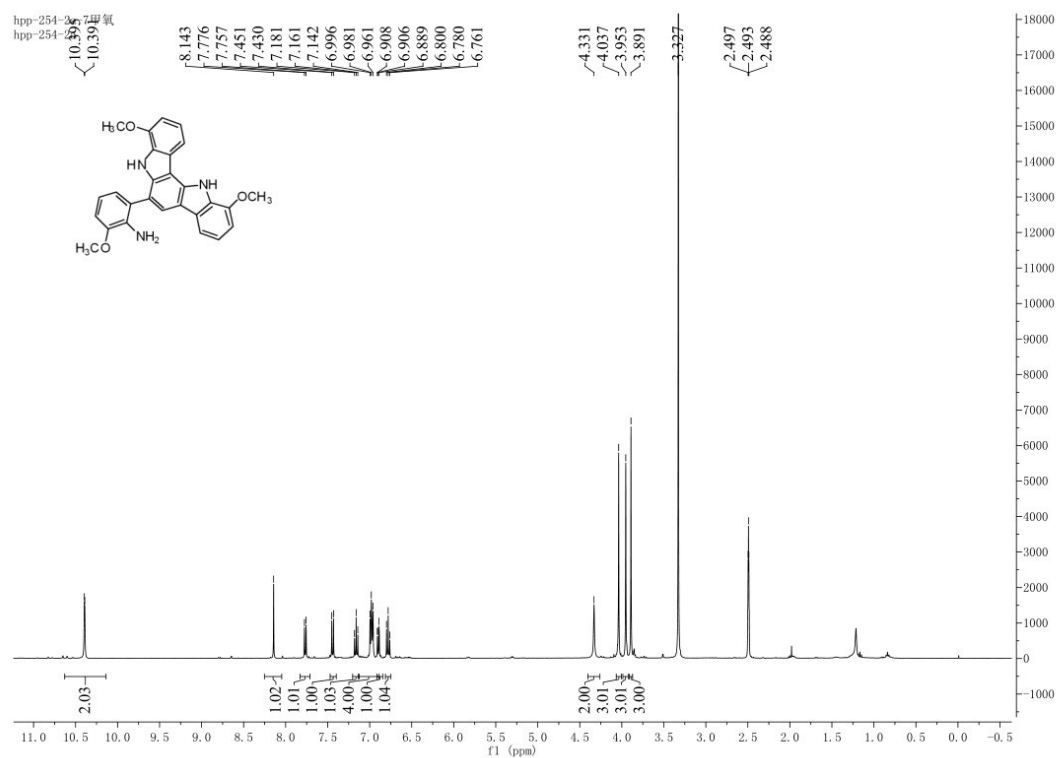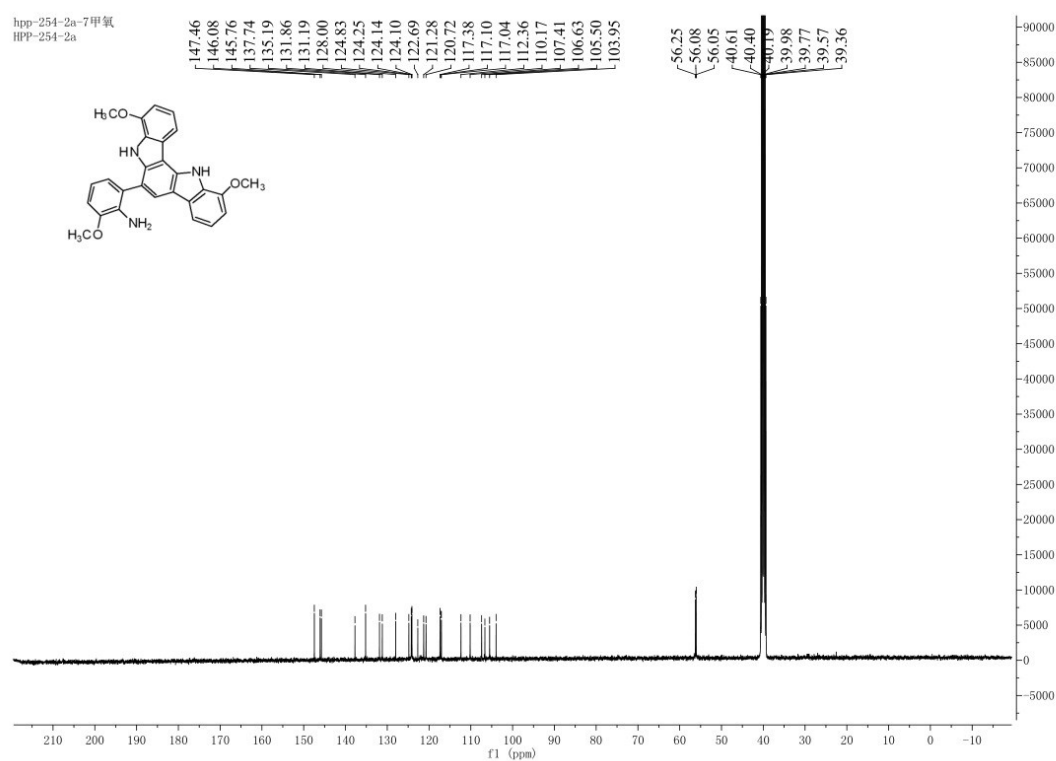

# <sup>1</sup>H and <sup>13</sup>C NMR Spectra for **10f**

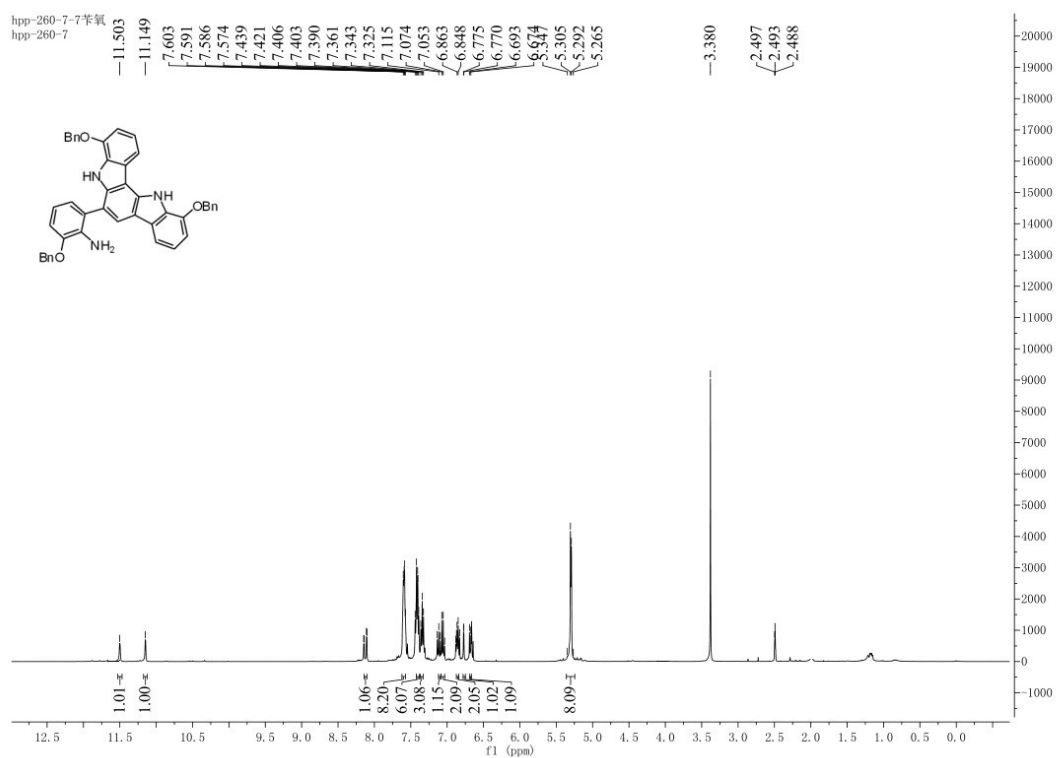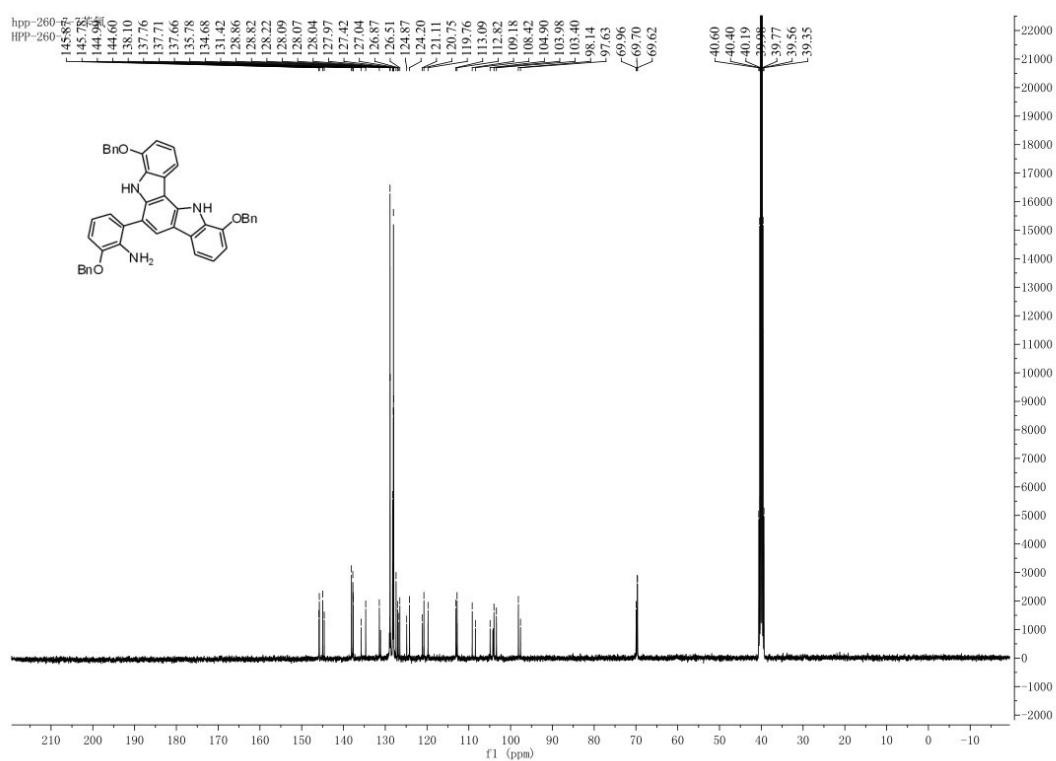

# $^1\text{H}$ and $^{13}\text{C}$ NMR Spectra for 11

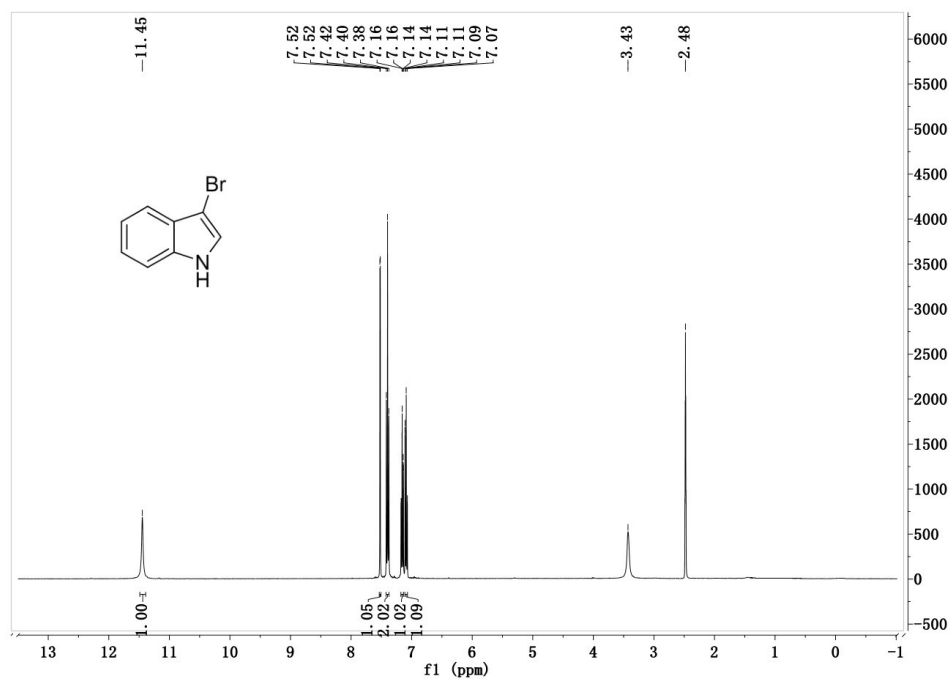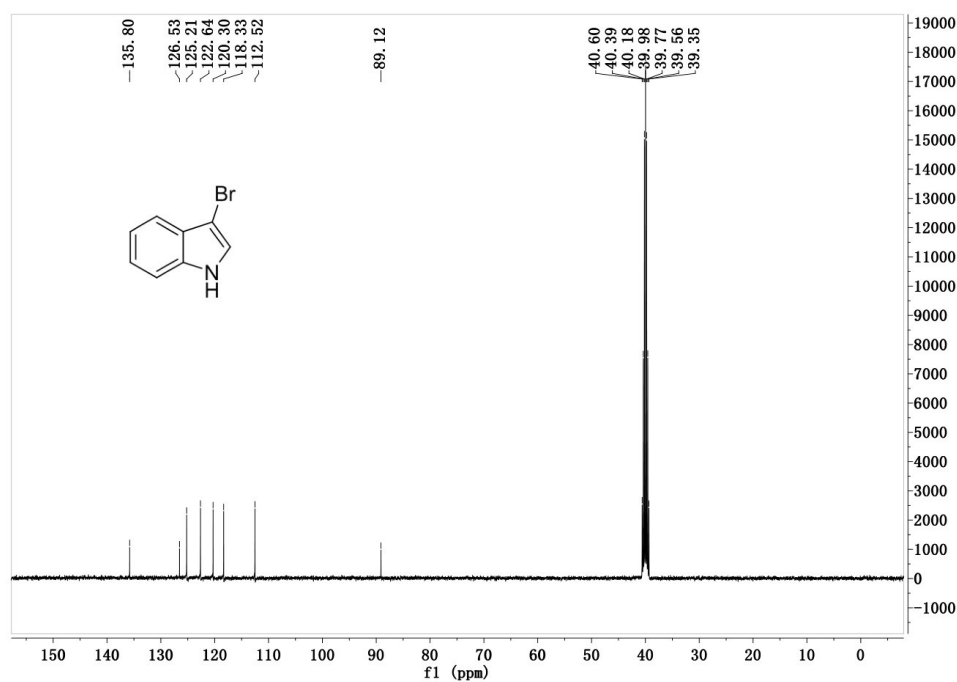

### 5. Copies of HRESIMS Spectra for 6n

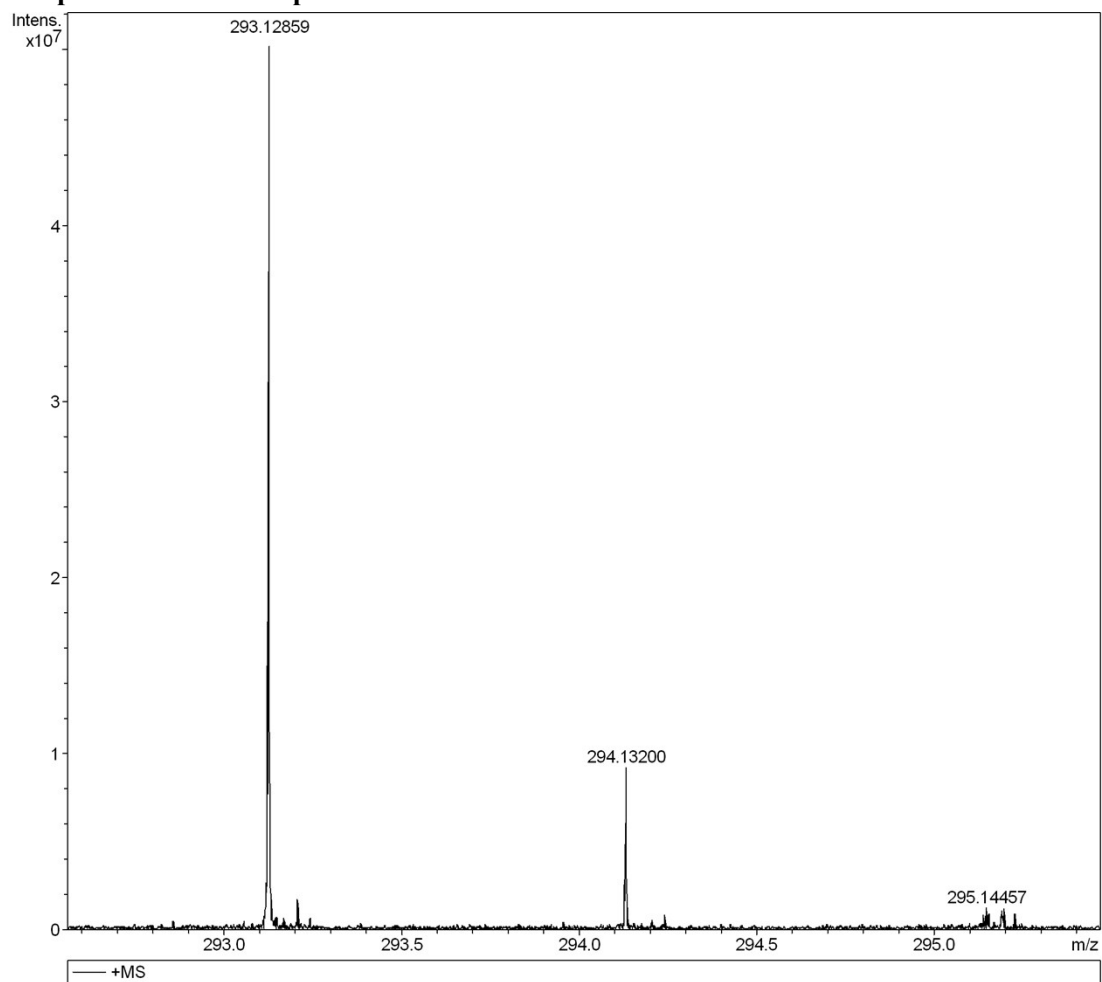

## 6. X-ray Data of Compound 10b

Temp :

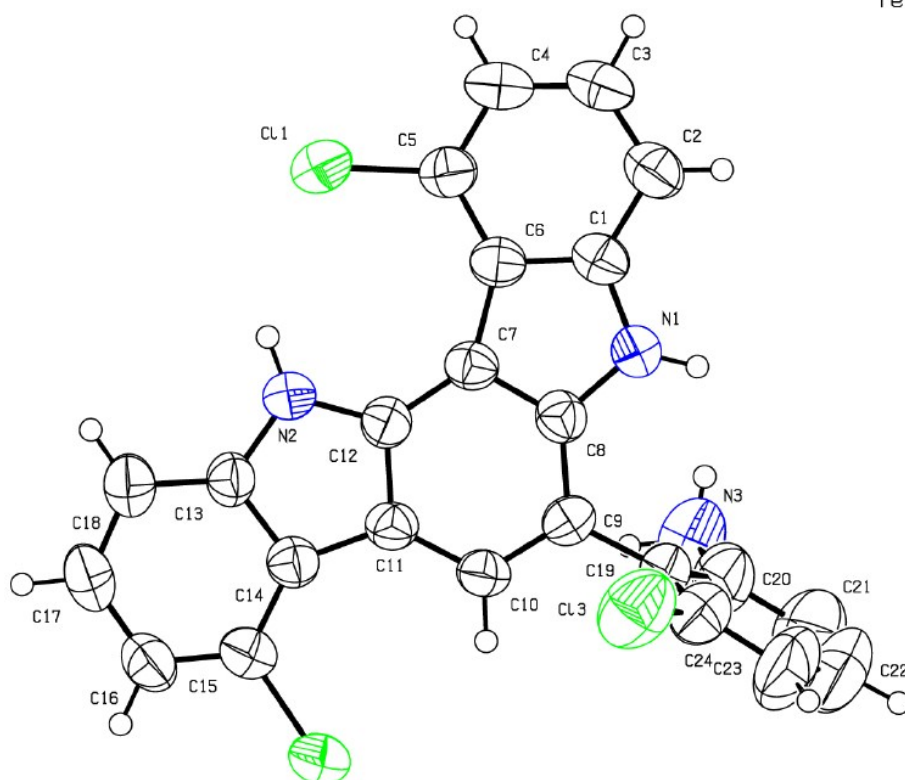

**Figure 1.** ORTEP representation of the molecular structure of **10b**.

The data have been assigned the following deposition numbers, **CCDC 1574092**.

## 7. References

1. N. H. Ansari, C. A. Dacko, N. G. Akhmedov and B. C. G. Söderberg, *J. Org. Chem.* **2016**, *81*, 9337–9349.
2. T. Guo, S. L. Han, Y. C. Liu, Y. Liu and H. M. Liu, *Tetrahedron Lett.* **2016**, *57*, 1097–1099.
3. V. Bocchi and G. Palla, *Tetrahedron* **1986**, *42*, 5019–5024.
